# Supplementary material for: Synthesis of Lasofoxifene, Nafoxidine and Their Positional Isomers via the Novel Three-Component Coupling Reaction
Source: MDPI journal article supplement (doi:10.3390/molecules15106773), 2010-09-28

*Supporting Information*

## Synthesis of Lasofoxifene, Nafoxidine and Their Positional Isomers via the Novel Three-Component Coupling Reaction

Kenya Nakata, Yoshiyuki Sano and Isamu Shiina \*

Department of Applied Chemistry, Faculty of Science, Tokyo University of Science, 1-3 Kagurazaka, Shinjuku-ku, Tokyo 162-8601, Japan

\* Author to whom correspondence should be addressed; E-Mail: shiina@rs.kagu.tus.ac.jp;  
Fax: +81-3-3260-5609.

*Received: 21 August 2010; in revised form: 13 September 2010 / Accepted: 20 September 2010/*

*Published: 28 September 2010*

---

### Supplementary Material

S2-25  $^1\text{H}$  and  $^{13}\text{C}$  NMR Spectroscopic Data of Compounds

NO.32

DFILE  
COMINT  
DATIM  
OBNUC  
EXMOD  
OBFRQ  
OBSET  
OBFIN  
POINT  
FREQU  
SCANS  
ACQTM  
PD  
PW1  
IRNUC  
CTEMP  
SLVNT  
EXREF  
BF  
RGAIN

C:\Documents and Settings\Shina Labi  
NO.32  
Mon May 28 10:18:31 2007

1H  
NON  
300.40 MHz  
130.00 KHz  
1150.00 Hz  
32768  
6020.40 Hz  
8  
5.4428 sec  
1.5539 sec  
5.40 usec  
1H  
20.9 c  
ODCL3  
1.26 ppm  
0.12 Hz  
7

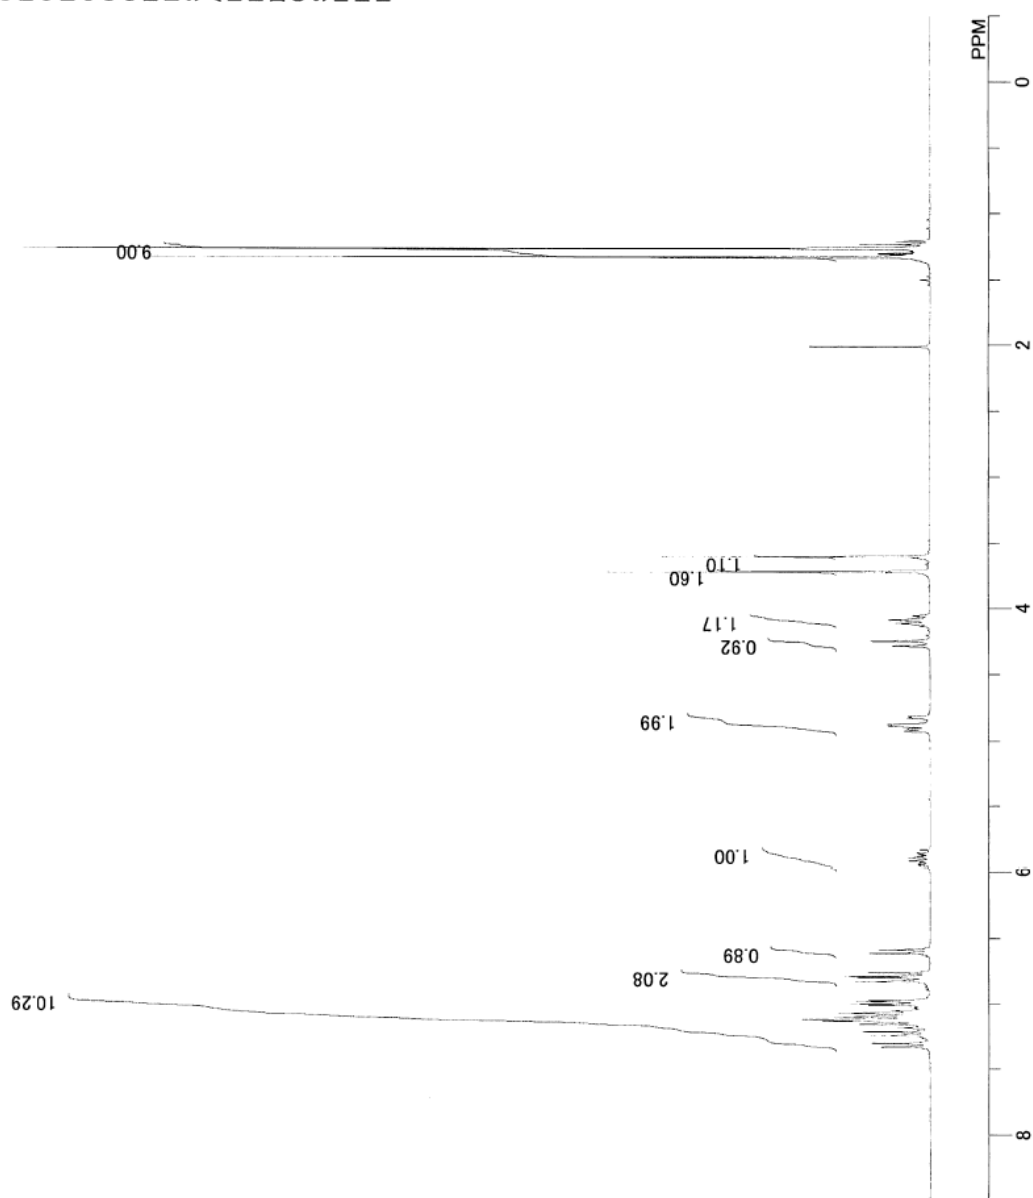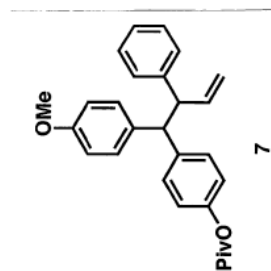

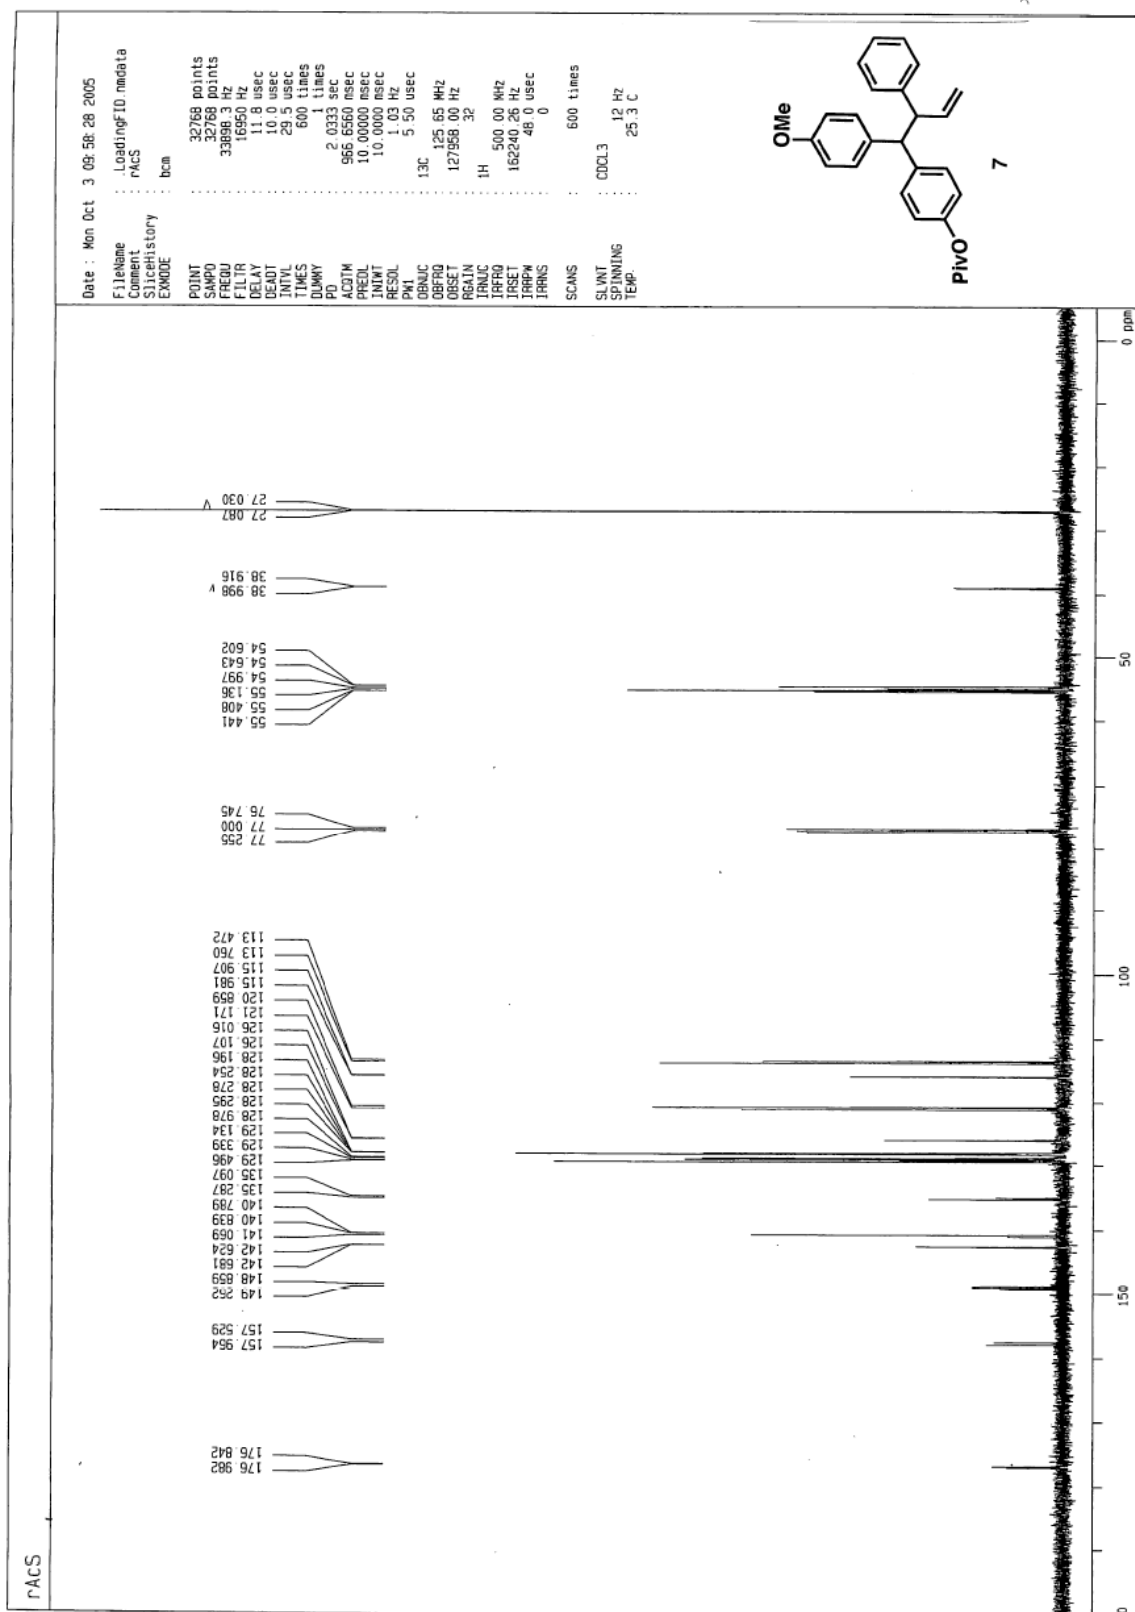

8号用

F:\I2-shita\1H.als  
I2-shita

DFILE F:\I2-shita\1H.als  
COMNT I2-shita  
DATIM Mon Aug 28 22:39:30 2010  
OBNUC 1H  
EXMOD NON  
OBFRQ 300.40 MHz  
OBSET 130.00 KHz  
OBFIN 1150.00 Hz  
POINT 32768  
FREQU 6020.40 Hz  
SCANS 8  
ACQTM 5.4428 sec  
PD 1.5539 sec  
PW1 5.40 usec  
IRNUC 1H  
CTEMP 21.9 c  
SLVNT CDCL3  
EXREF 7.26 ppm  
BF 0.12 Hz  
RGAIN 10

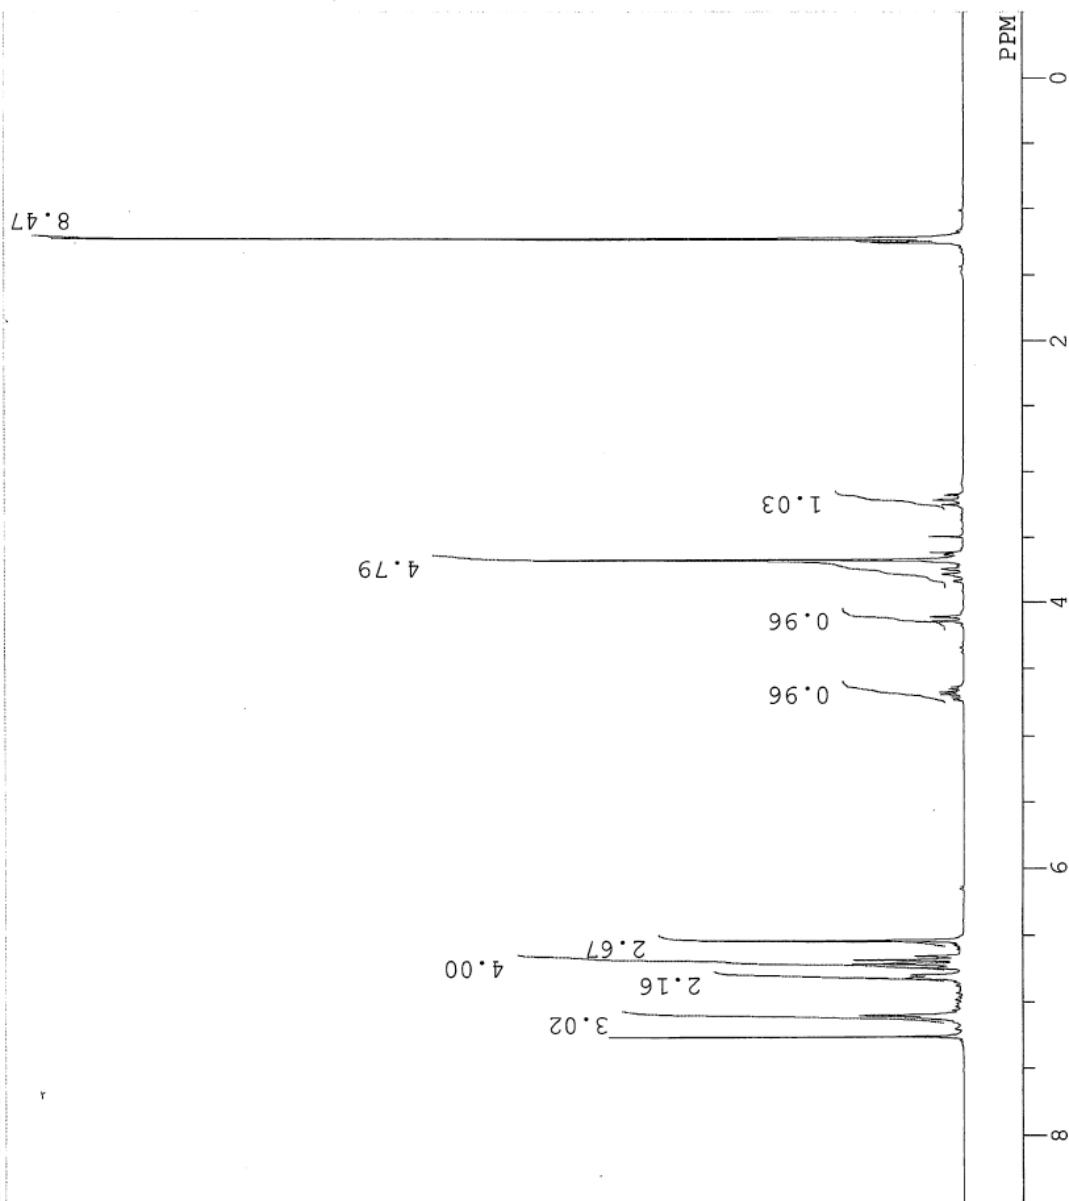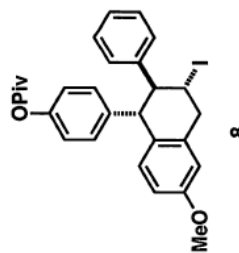

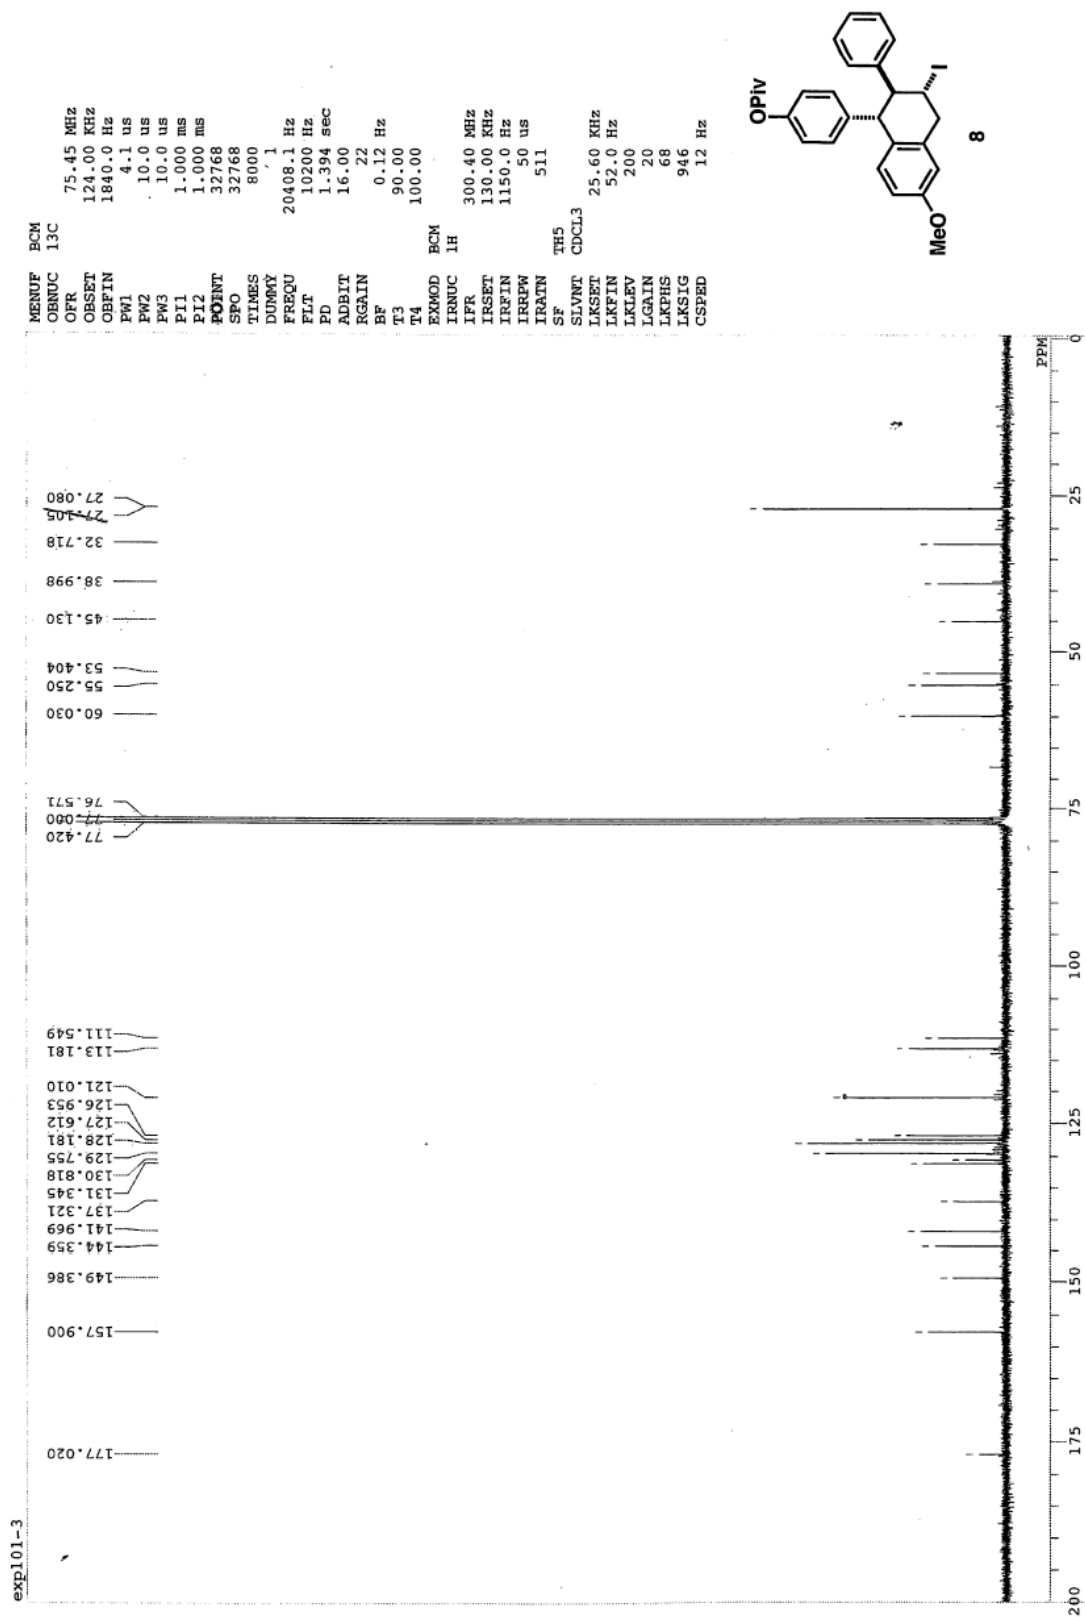

E:\I2-up(data).als  
I2-up(data)

DFILE E:\I2-up(data).als  
COMNT I2-up(data)  
DATIM Wed Sep 20 21:23:47 20  
OBNUC 1H  
EXMOD non  
OBFRQ 500.00 MHz  
OBSET 0.00 KHz  
OBFIN 162160.00 Hz  
POINT 32768  
FREQU 10000.00 Hz  
SCANS 8  
ACQTM 3.2768 sec  
PD 3.7232 sec  
PW1 6.15 usec  
IRNUC 1H  
CTEMP 23.4 C  
SIVNT CDCL3  
EXREF 7.26 ppm  
BF 0.12 Hz  
RGAIN 15

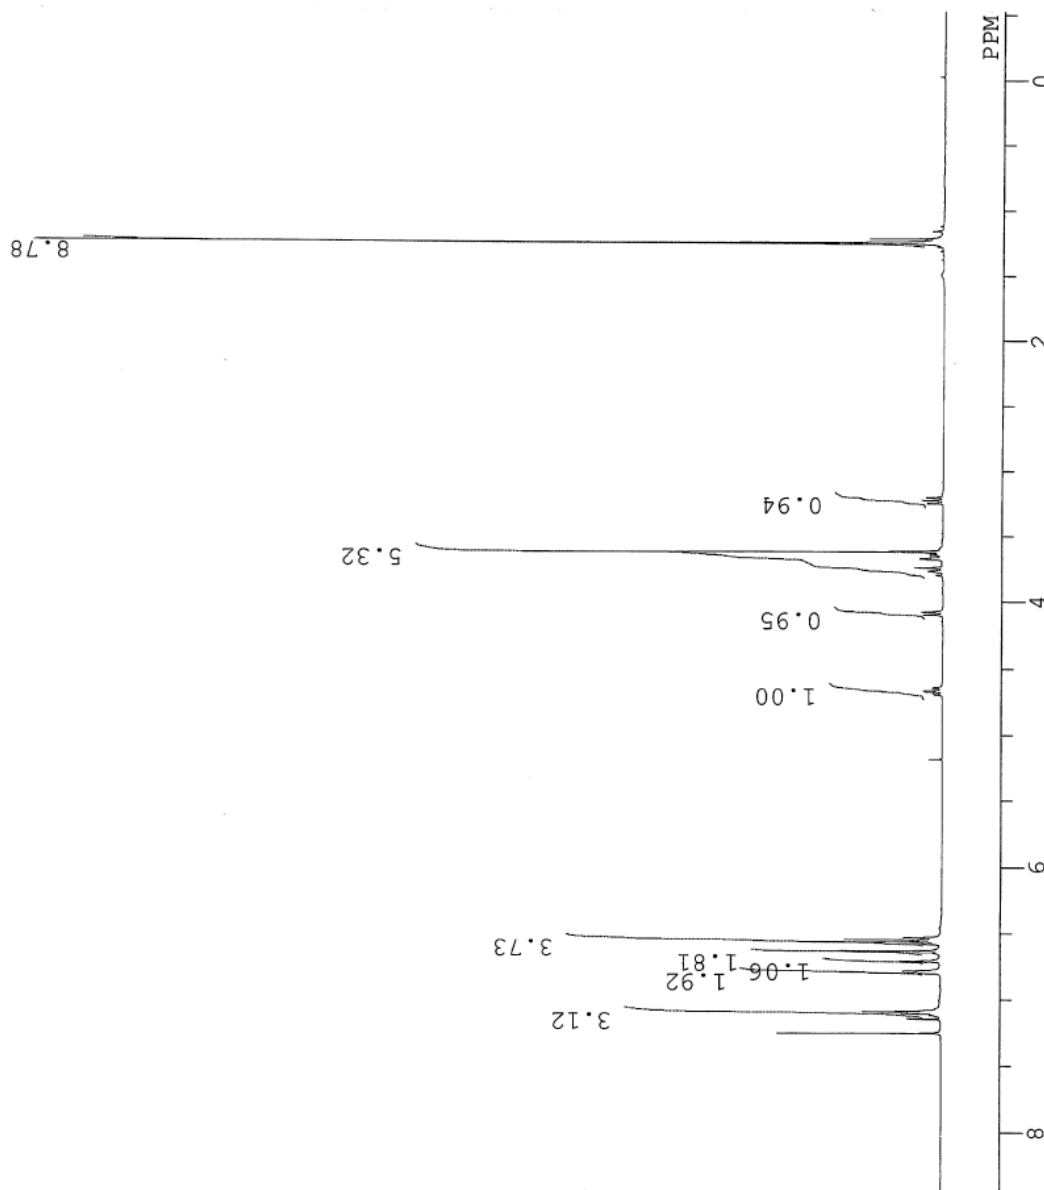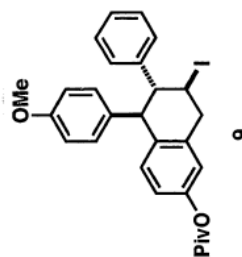

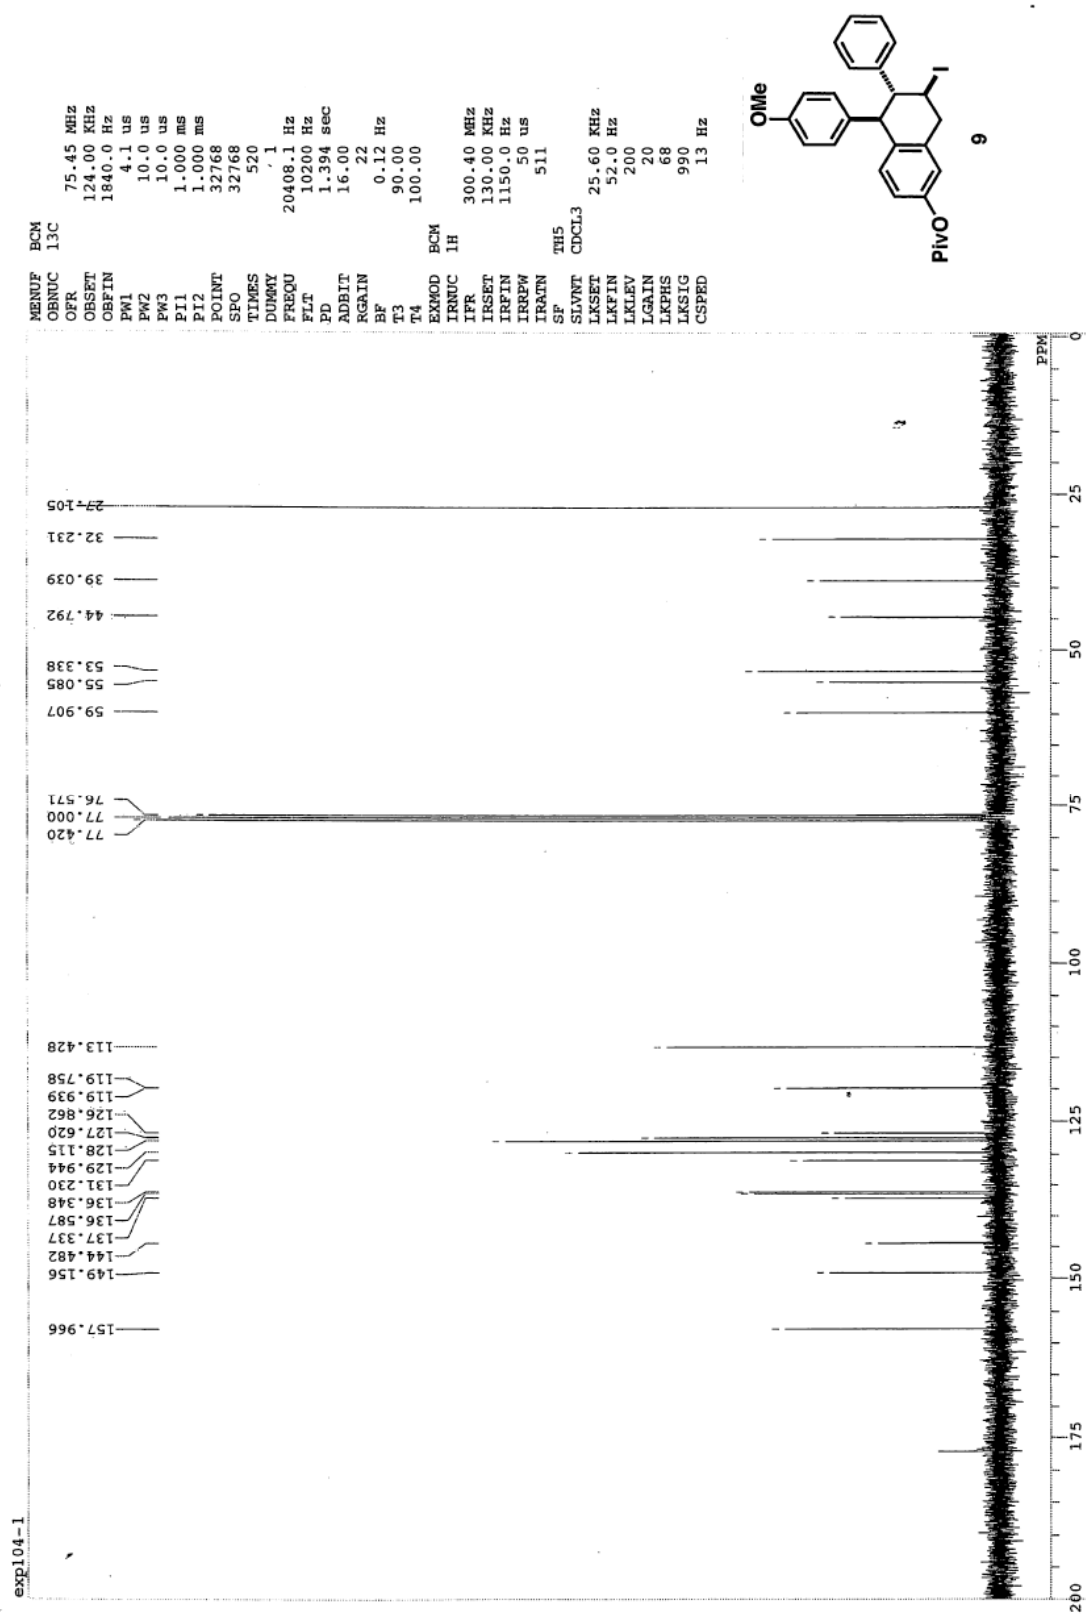

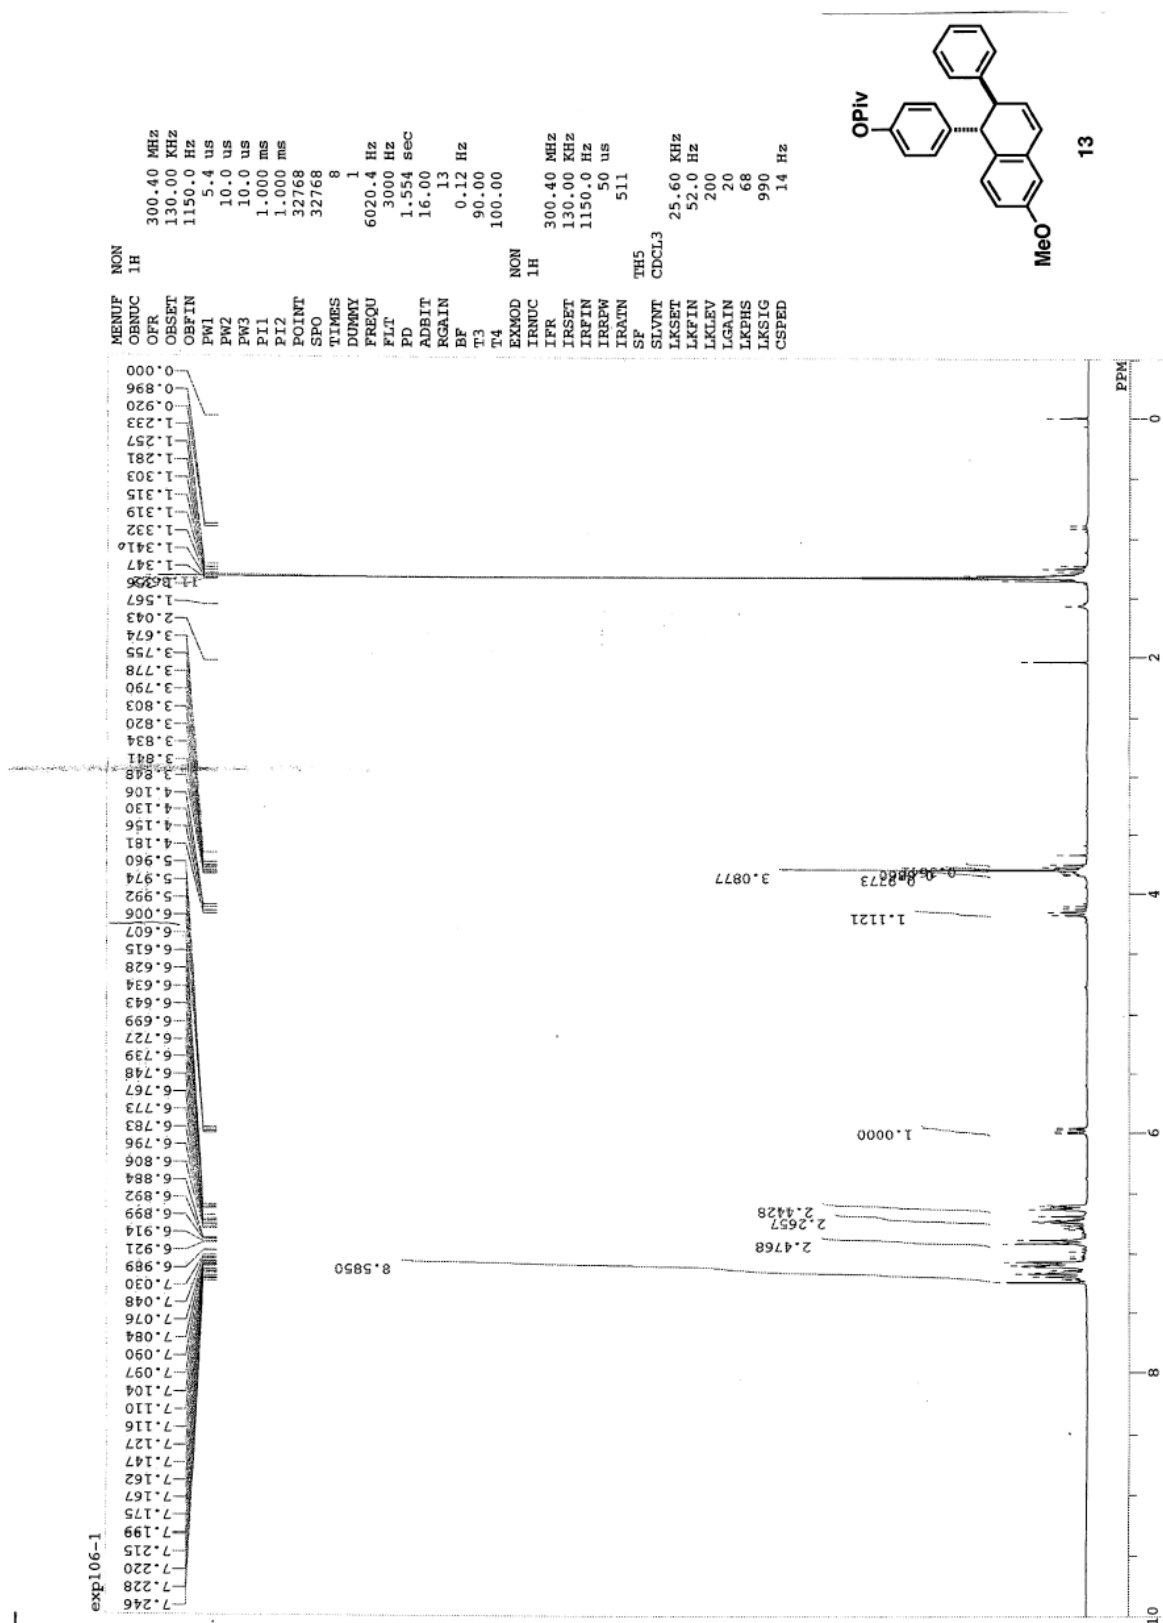



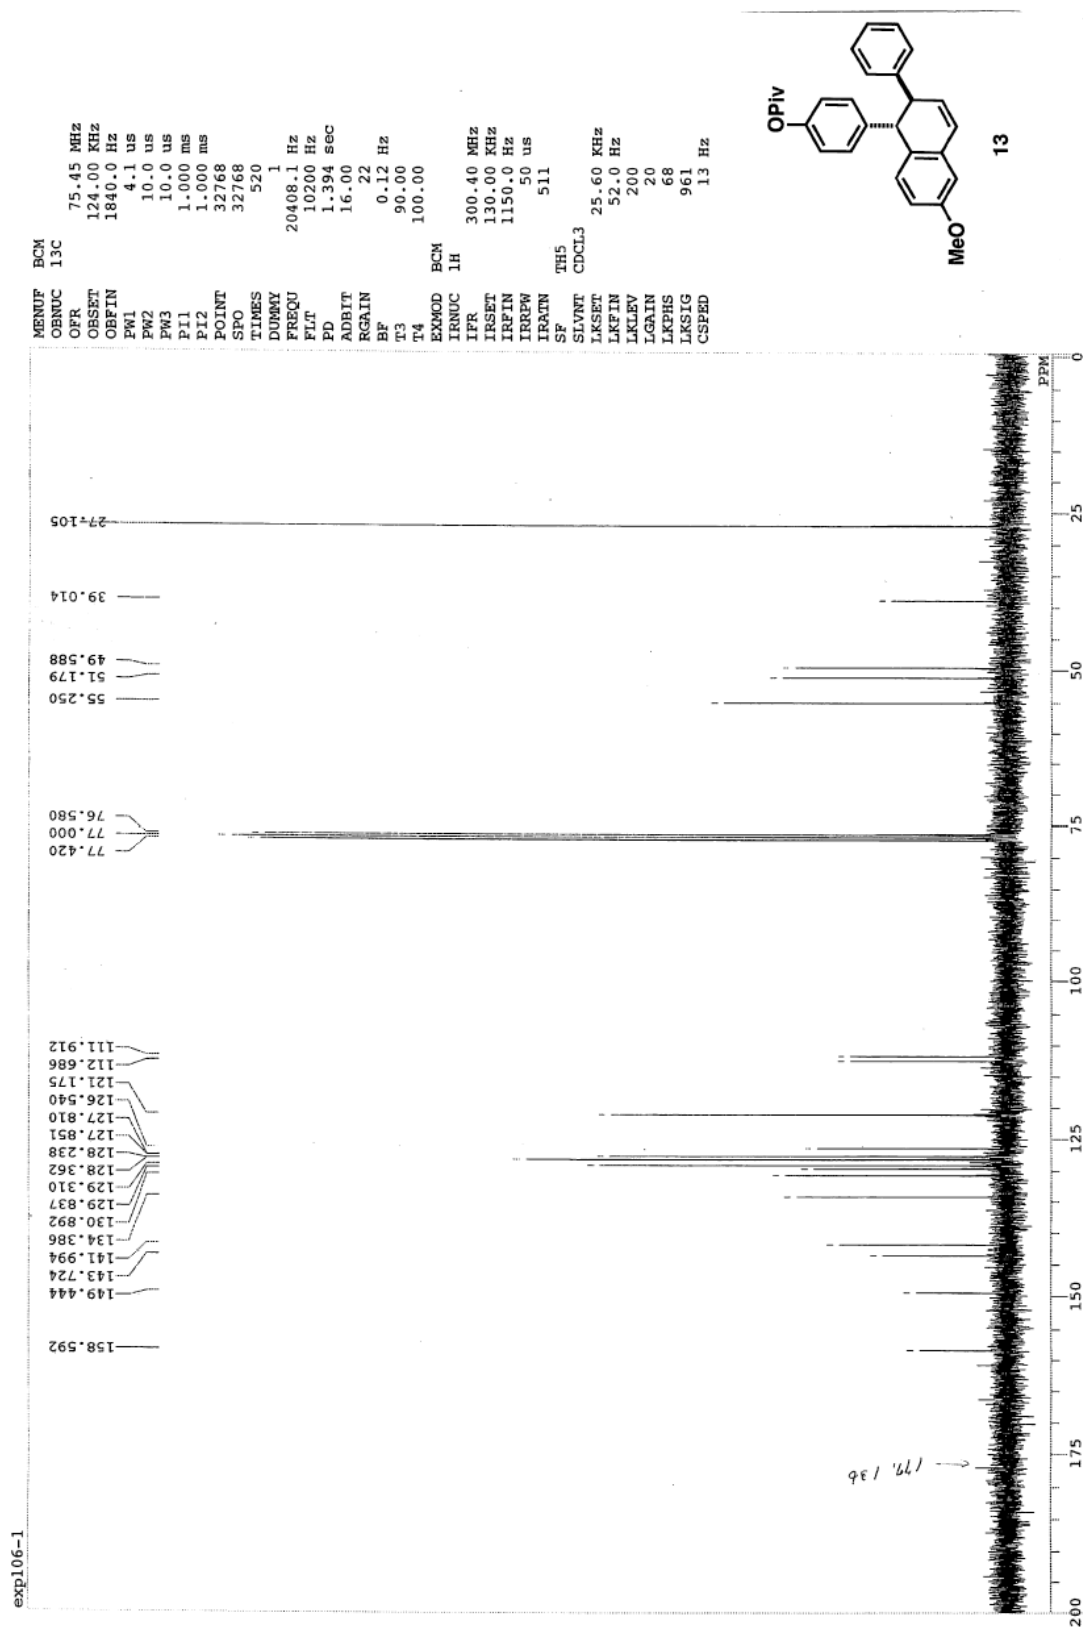

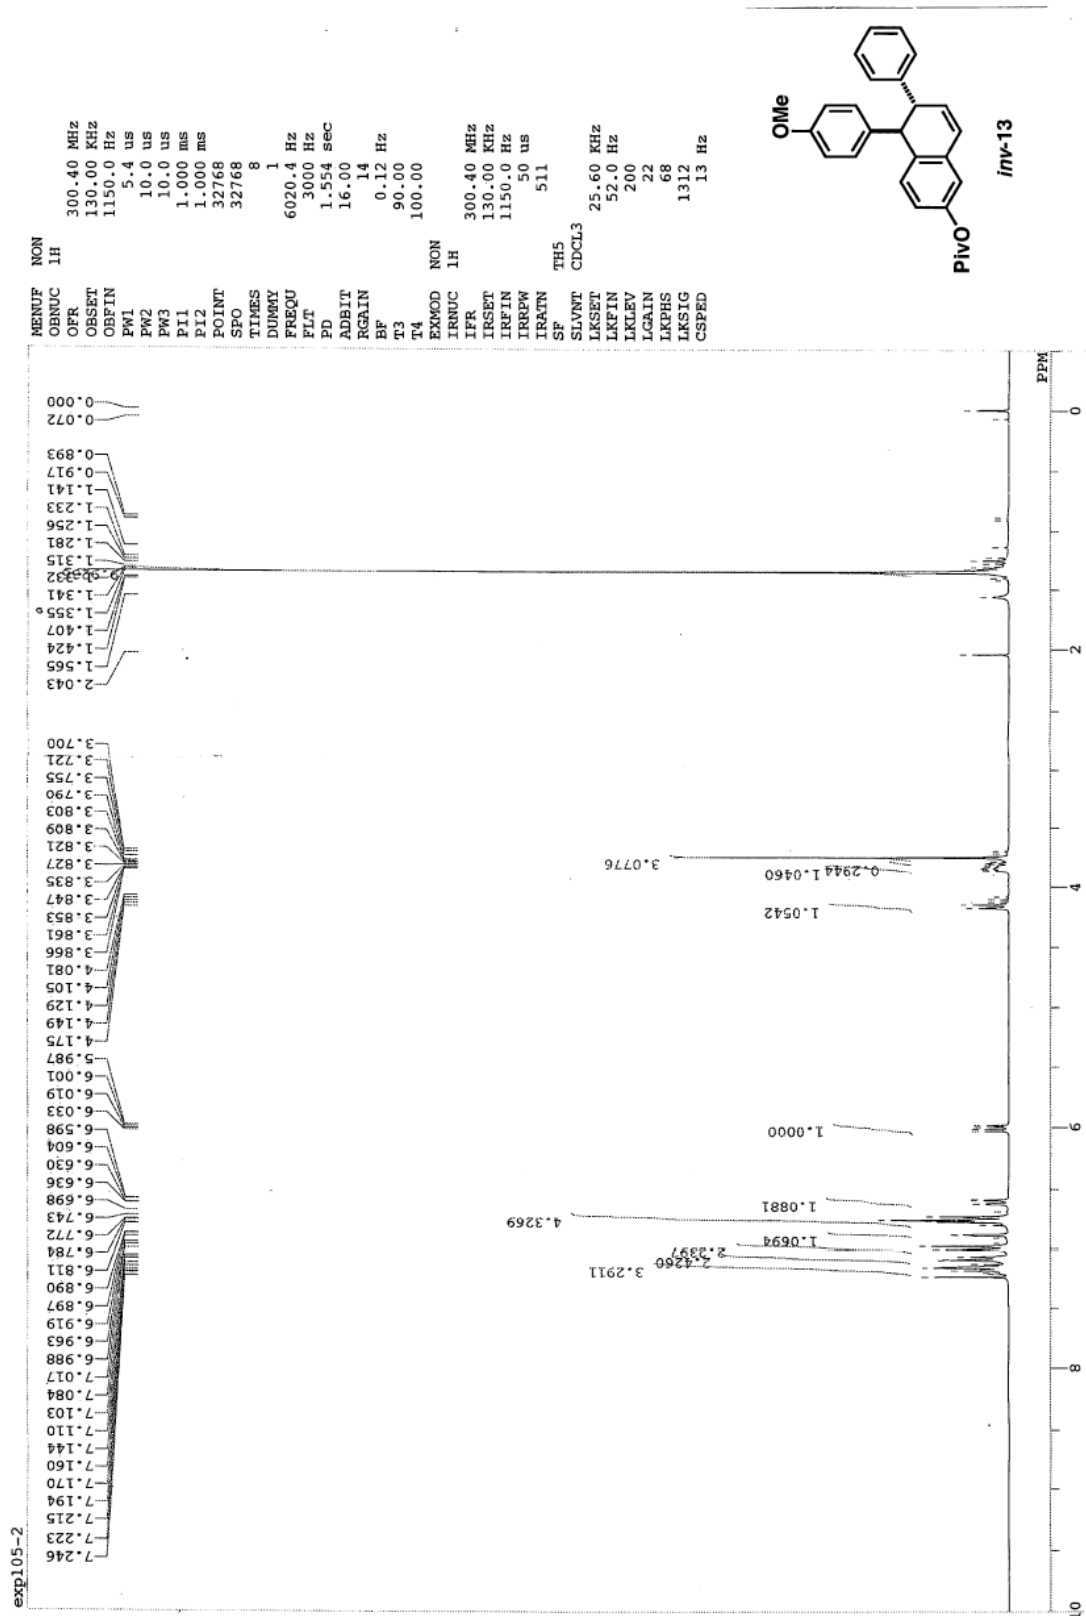

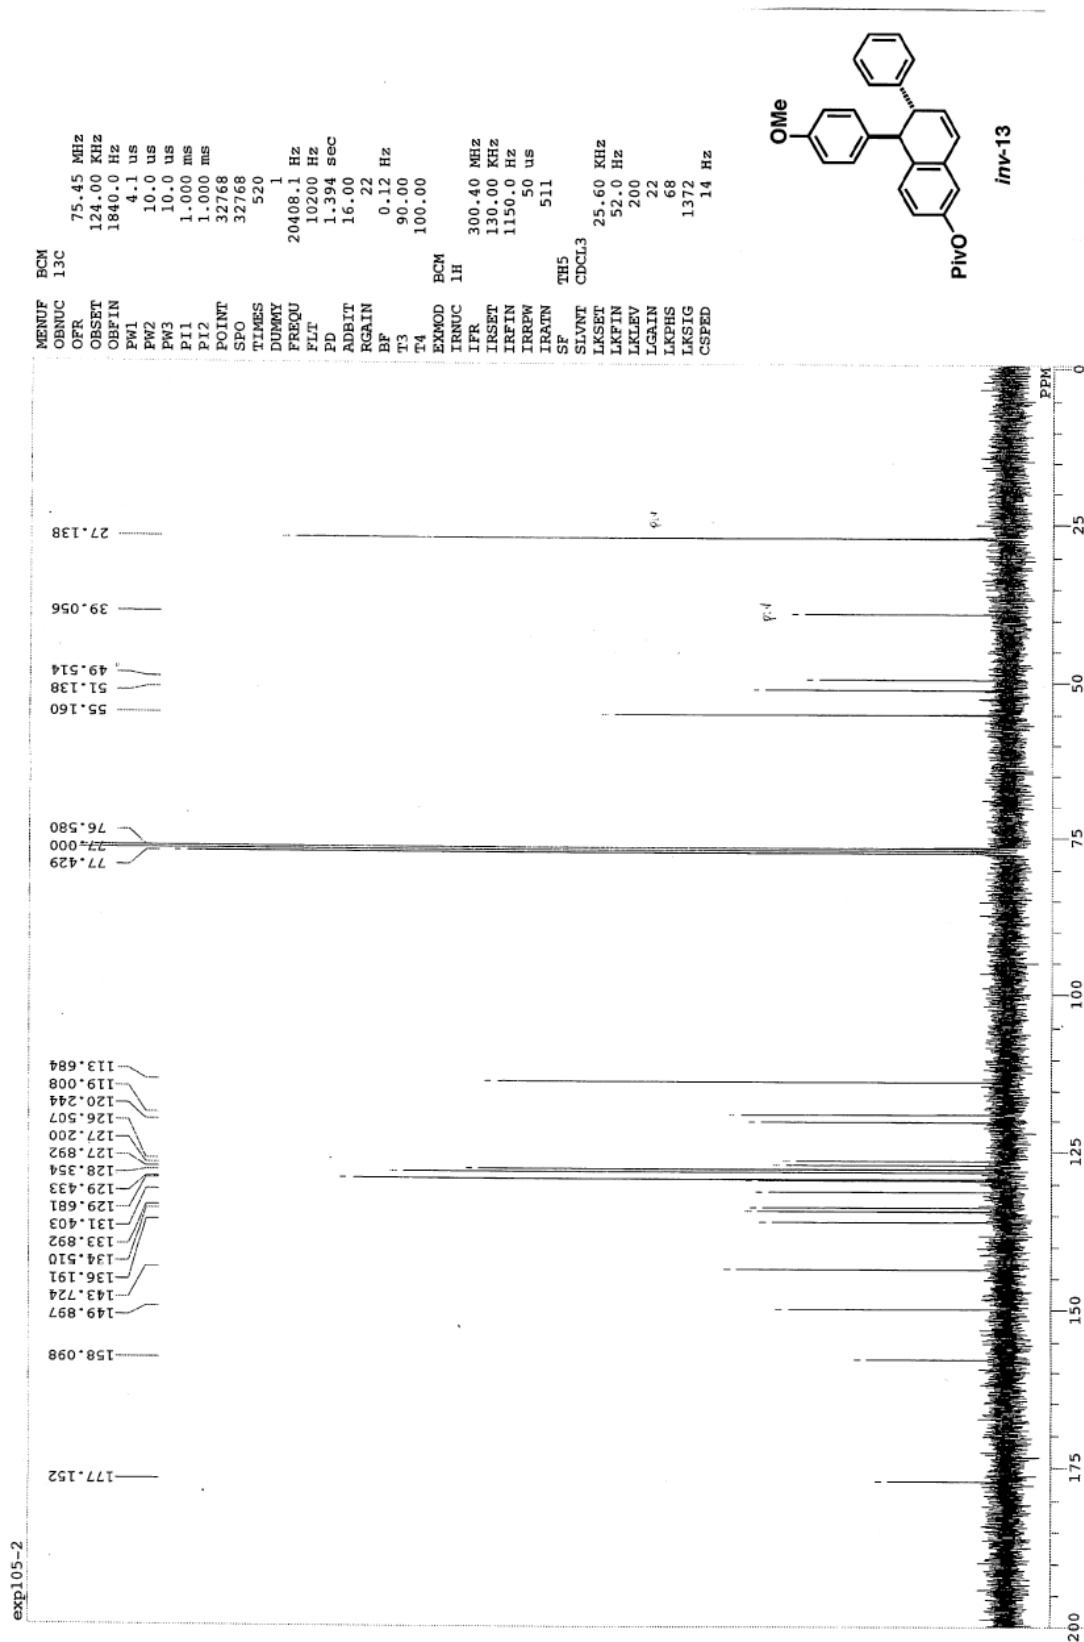

E:\KN-1-175-2.als  
JCAMP-DX Data file

DFILE E:\KN-1-175-2.als  
COMNT JCAMP-DX Data file  
DATIM 2006/Sep/01 11:14:39  
OBNUC 1H  
EXMOD ZG30  
OBFRQ 300.01 MHz  
OBSET 0.00 KHz  
OBFIN 1842.92 Hz  
POINT 32768  
FREQU 6172.84 Hz  
SCANS 16  
ACQTM 0.0000 sec  
PD 0.0000 sec  
PW1 11.70 usec  
IRNUC OFF  
CTEMP 22.9 C  
SLVNT CDCL3  
EXREF 7.26 ppm  
BF 0.25 Hz  
RGAIN 228

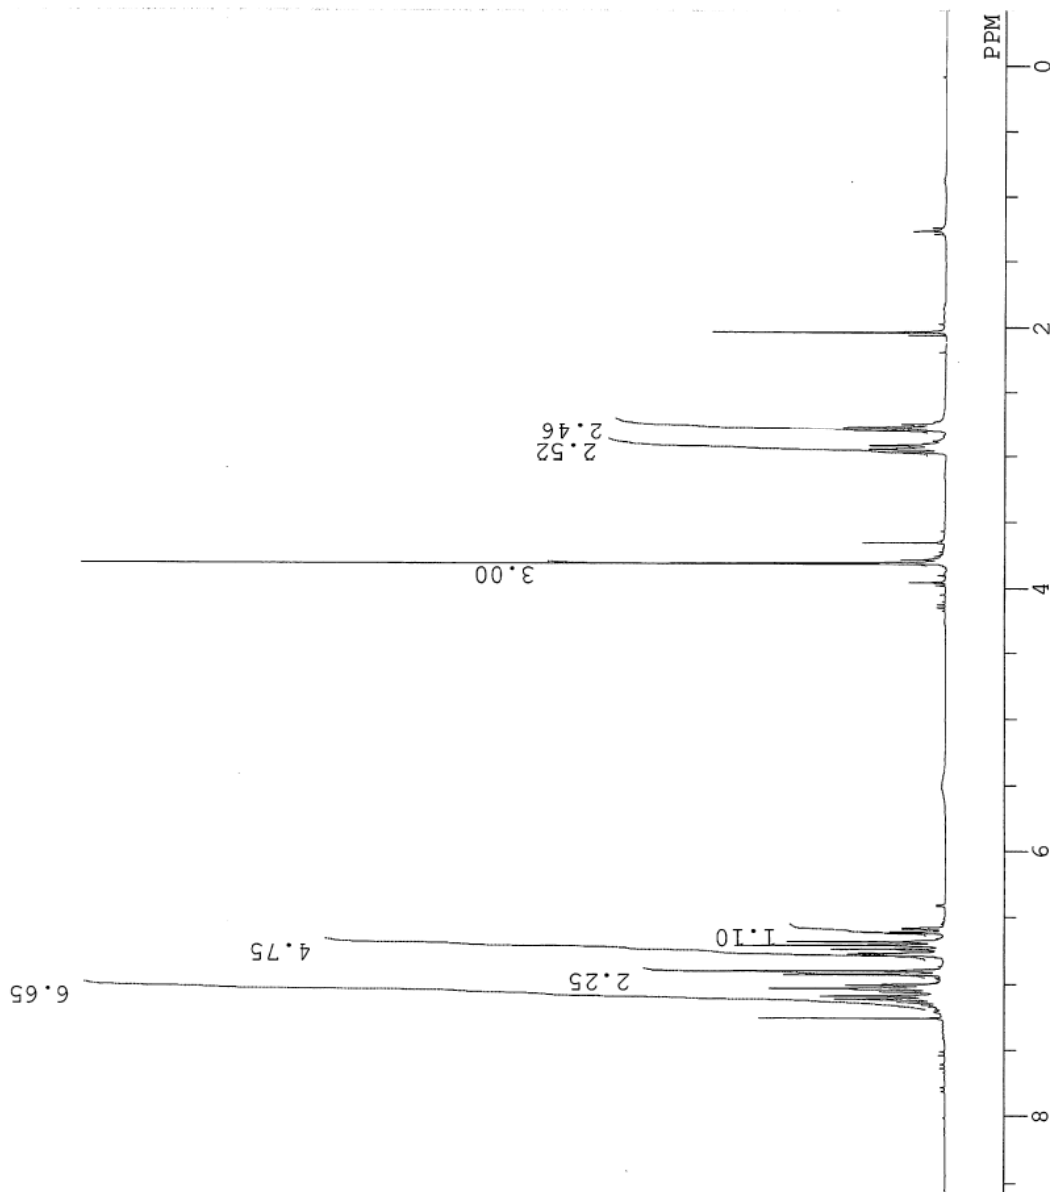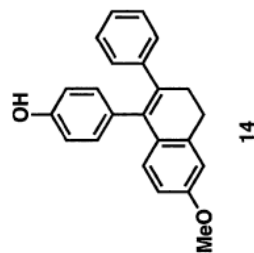

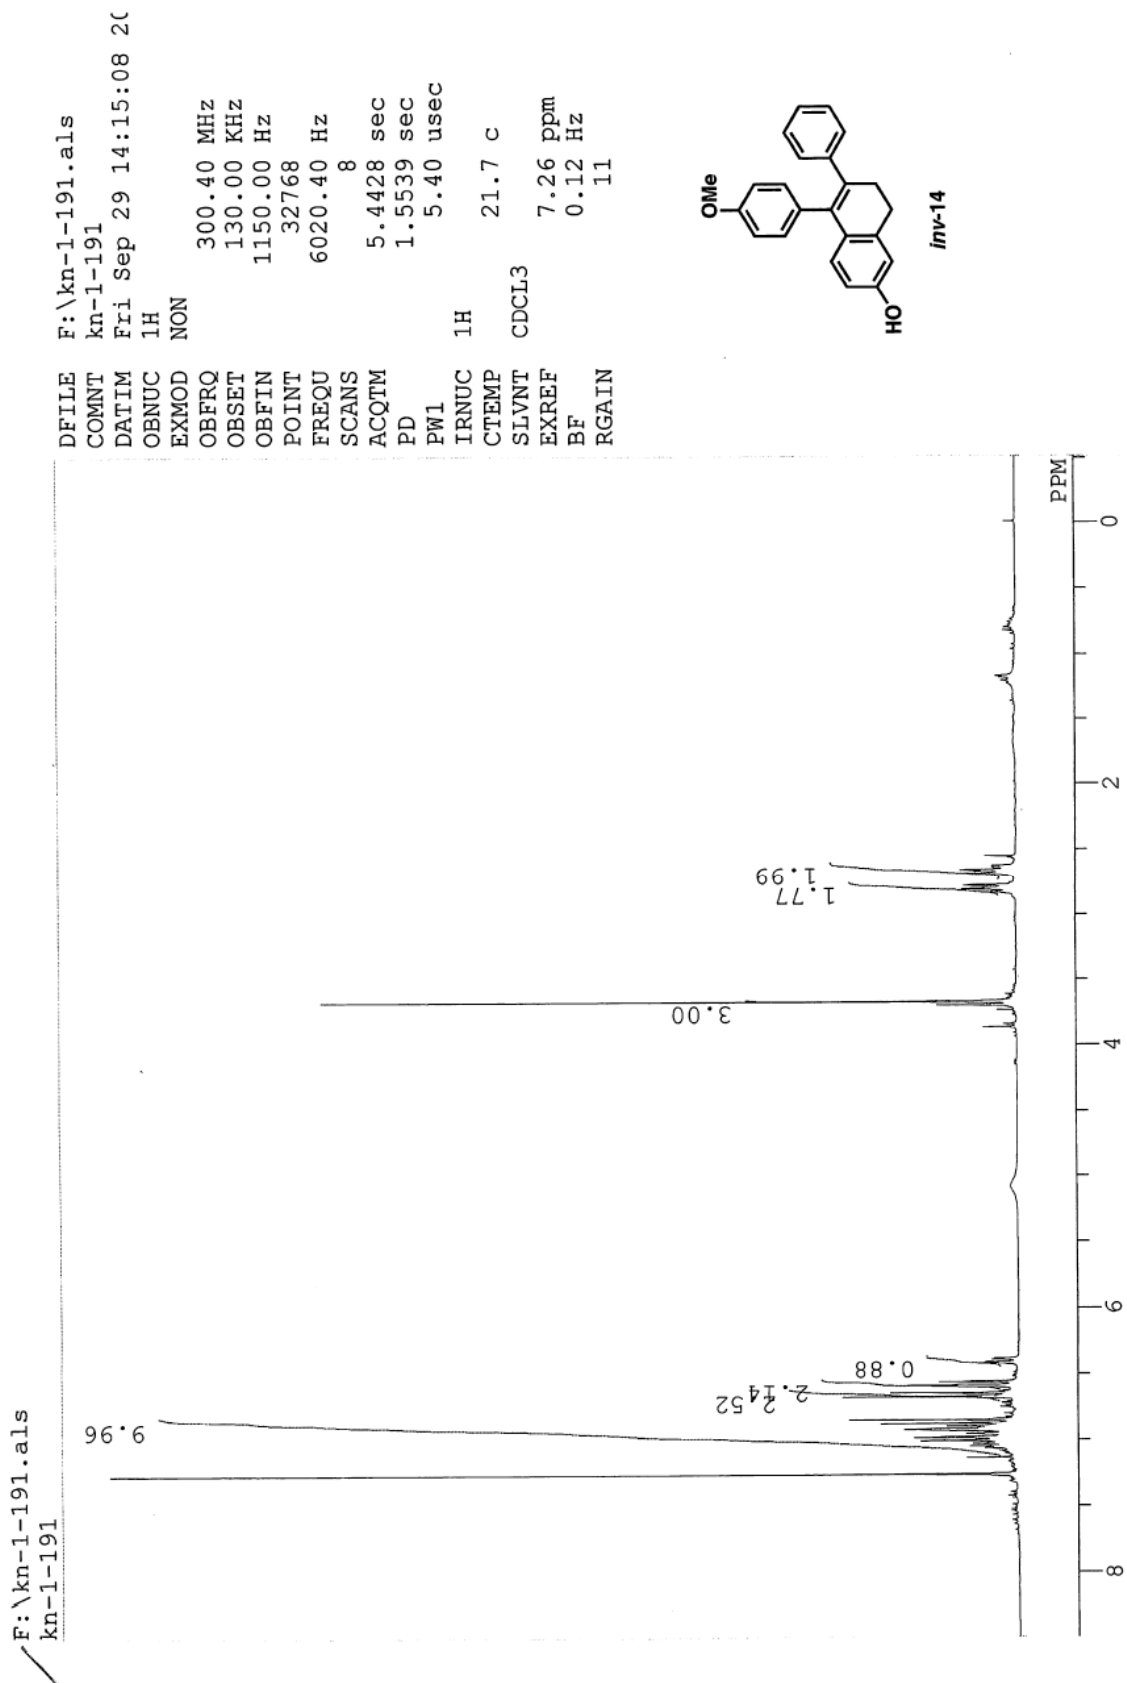

E:\kn-1-175relH.als  
kn-1-175re

DFILE E:\kn-1-175relH.als  
COMNT kn-1-175re  
DATIM Wed Sep 20 21:33:11 20  
OBNUC 1H  
EXMOD non  
OBFRQ 500.00 MHz  
OBSET 0.00 KHz  
OBFIN 162160.00 Hz  
POINT 32768  
FREQU 10000.00 Hz  
SCANS 8  
ACQTM 3.2768 sec  
PD 3.7232 sec  
PW1 6.15 usec  
IRNUC 1H  
CTEMP 23.8 c  
SLVNT CDCL3  
EXREF 7.26 ppm  
BF 0.12 Hz  
RGAIN 16

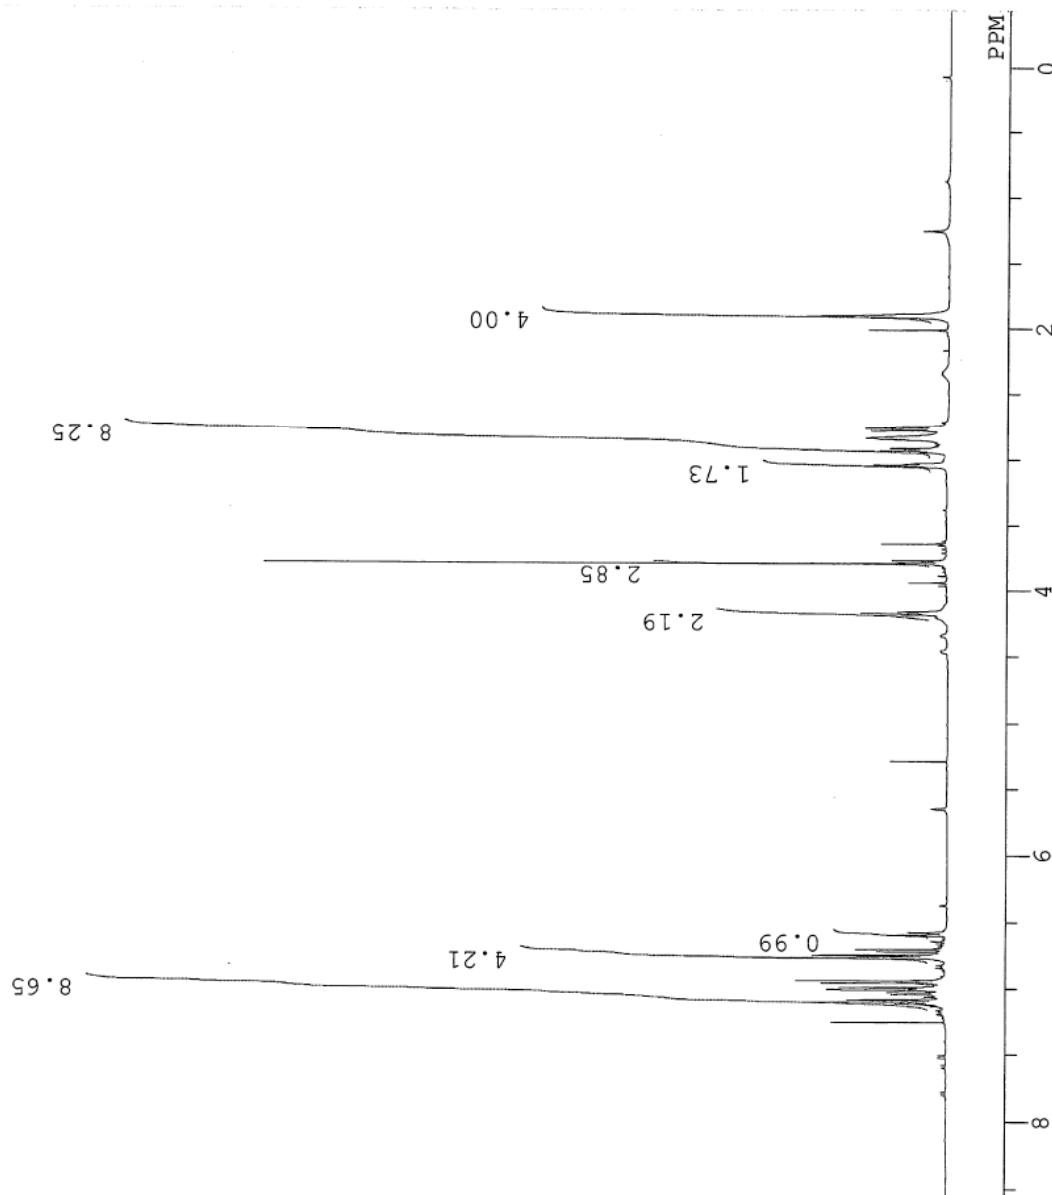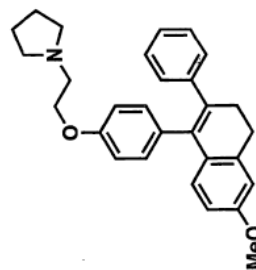

Nafoxidine (2)

E:\kn-1-175rel13C.als  
kn-1-175re

DFILE E:\kn-1-175rel13C.als  
COMNT kn-1-175re  
DATIM Wed Sep 20 22:23:30 2010  
OBNUC 13C  
EXMOD bcm  
OBFRQ 125.65 MHz  
OBSET 0.00 KHz  
OBFIN 127958.00 Hz  
POINT 32768  
FREQU 33898.30 Hz  
SCANS 1000  
ACQTM 0.9667 sec  
PD 2.0333 sec  
PW1 5.10 usec  
IRNUC 1H  
CTEMP 25.8 c  
SLVNT CDCL3  
EXREF 77.00 ppm  
BF 1.20 Hz  
RGAIN 28

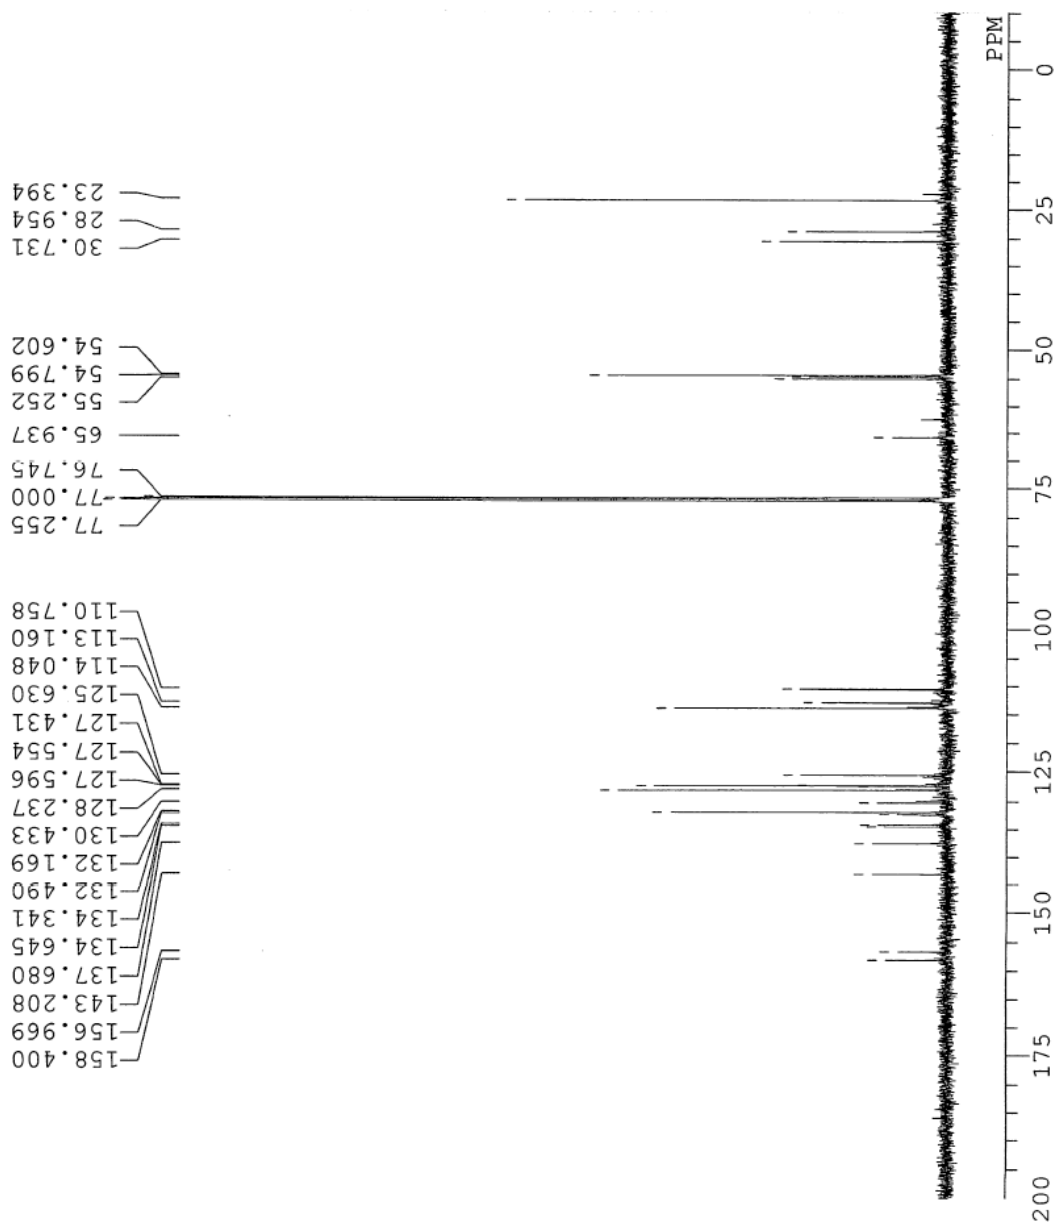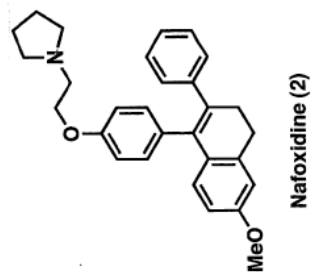

E:\KN-2-163-PURE.als  
JCAMP-DX Data file

DFILE E:\KN-2-163-PURE.als  
COMNT JCAMP-DX Data file  
DATIM 2007/Jan/19 12:38:34  
OBNUC 1H  
EXMOD ZG30  
OBFRQ 300.01 MHz  
OBSET 0.00 KHz  
OBFIN 1842.92 Hz  
POINT 32768  
FREQU 6172.84 Hz  
SCANS 8  
ACQTM 0.0000 sec  
PD 0.0000 sec  
PW1 11.70 usec  
IRNUC OFF  
CTEMP 22.9 c  
SLVNT CDCL3  
EXREF 7.26 ppm  
BF 0.25 Hz  
RGAIN 228

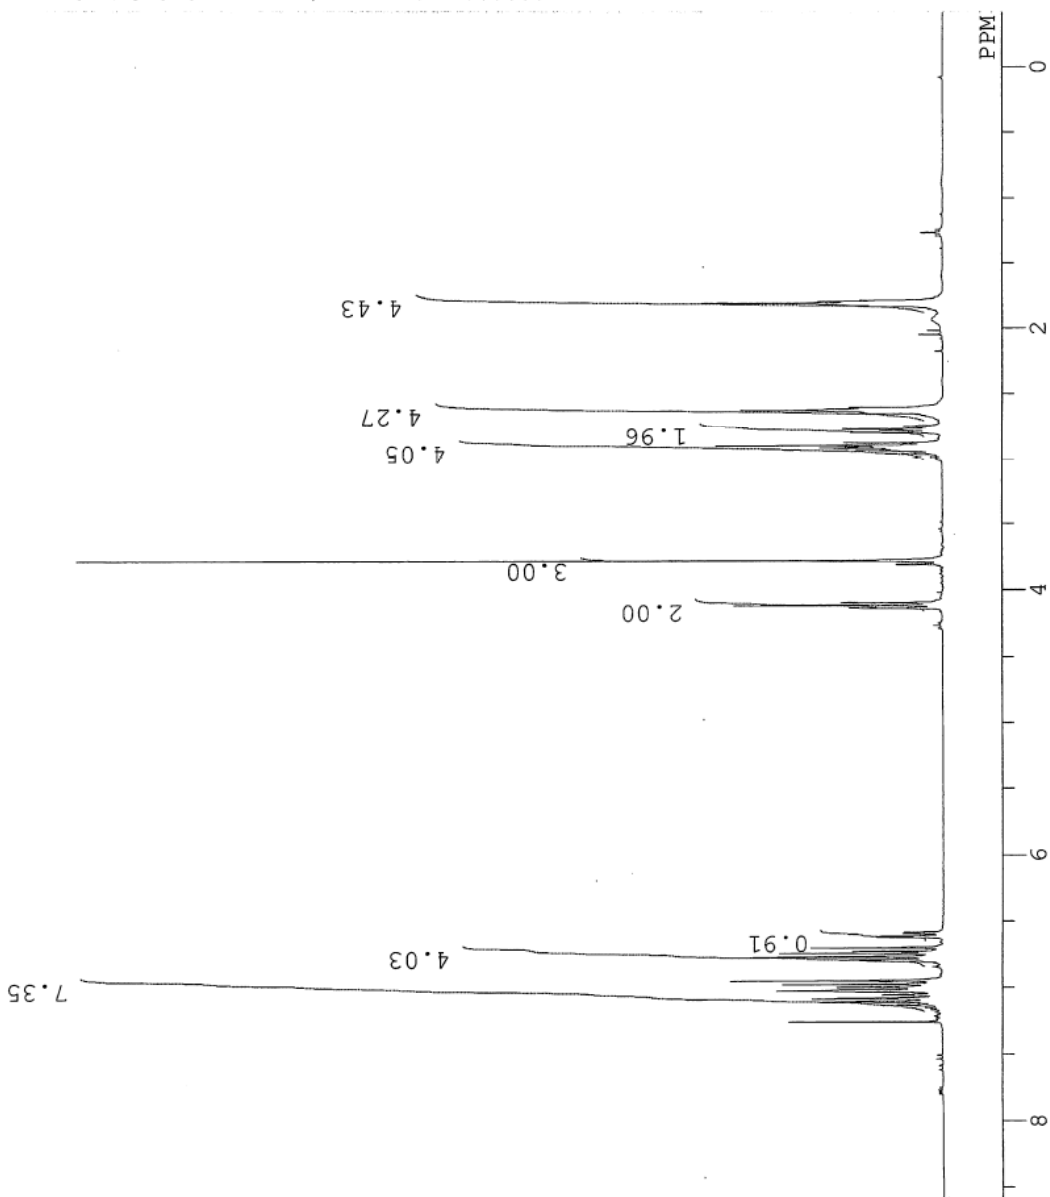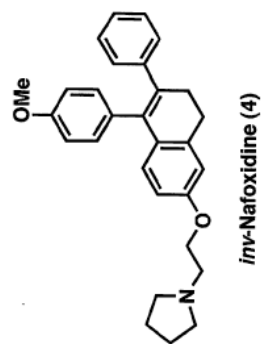



F:\kn-2-163-13C.als  
kn-2-163-13C

DFILE F:\kn-2-163-13C.als  
COMNT kn-2-163-13C  
DATIM Sat Jan 20 10:30:10 20  
OBNUC 13C  
EXMOD BCM  
OBFRQ 75.45 MHz  
OBSET 124.00 KHz  
OBFIN 1840.00 Hz  
POINT 32768  
FREQU 20408.10 Hz  
SCANS 640  
ACQTM 1.6056 sec  
PD 1.3944 sec  
PW1 4.10 usec  
IRNUC 1H  
CTEMP 20.6 c  
SLVNT CDCL3  
EXREF 77.00 ppm  
BF 1.20 Hz  
RGAIN 22

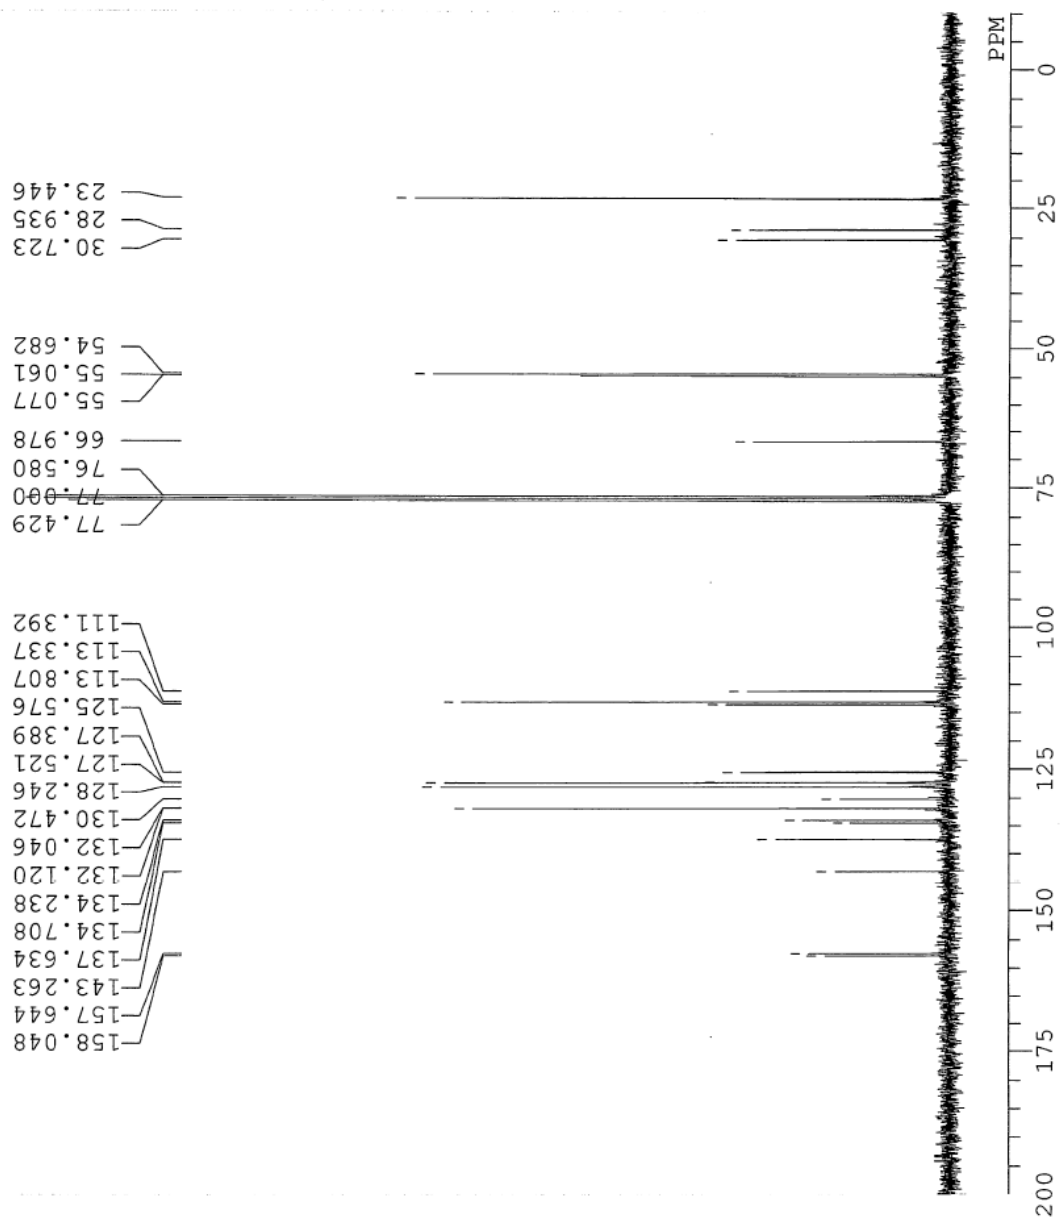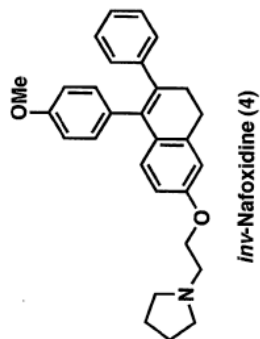

F:\kn-1-189nmr1.als  
kn-1-189NMR1

DFILE F:\kn-1-189nmr1.als  
COMNT kn-1-189NMR1  
DATIM Tue Sep 19 16:50:27 2010  
OBNUC 1H  
EXMOD NON  
OBFRQ 300.40 MHz  
OBSET 130.00 KHz  
OBFIN 1150.00 Hz  
POINT 32768  
FREQU 6020.40 Hz  
SCANS 8  
ACQTM 5.4428 sec  
PD 1.5539 sec  
PW1 5.40 usec  
IRNUC 1H  
CTEMP 21.9 c  
SLVNT CDCL3  
EXREF 7.26 ppm  
BF 0.12 Hz  
RGAIN 13

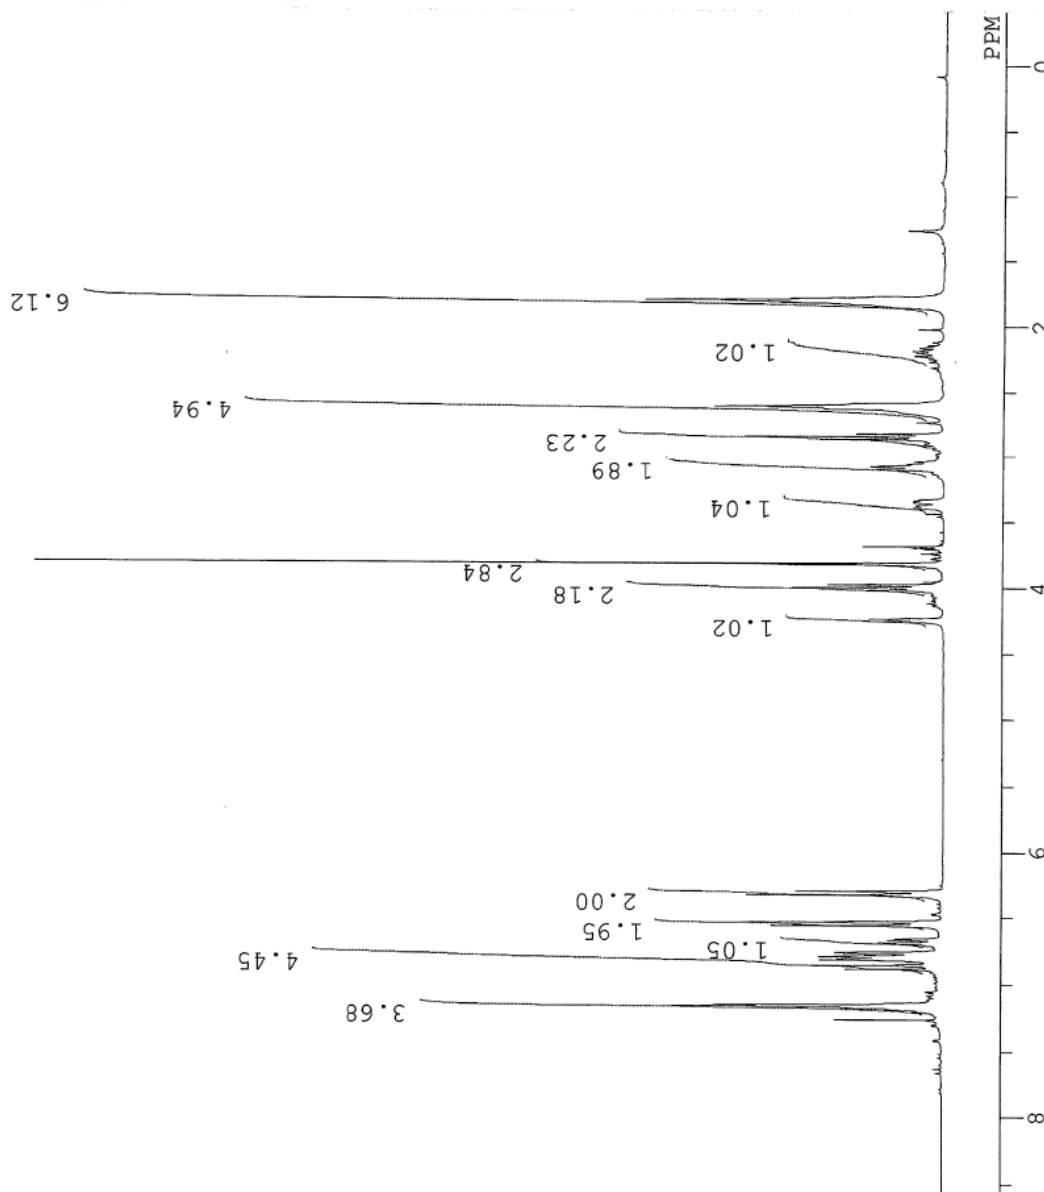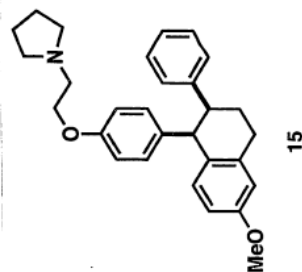

E:\kn-1-189NMR1.als  
kn-1-189NMR1

DFILE E:\kn-1-189NMR1.als  
COMNT kn-1-189NMR1  
DATIM Thu Sep 21 16:04:46 2010  
OBNUC 13C  
EXMOD bcm  
OBFRQ 125.65 MHz  
OBSET 0.00 KHz  
OBFIN 127958.00 Hz  
POINT 32768  
FREQU 33898.30 Hz  
SCANS 500  
ACQTM 0.9667 sec  
PD 2.0333 sec  
PW1 5.10 usec  
IRNUC 1H  
CTEMP 25.9 c  
SLVNT CDCL3  
EXREF 77.00 ppm  
BF 1.20 Hz  
RGAIN 30

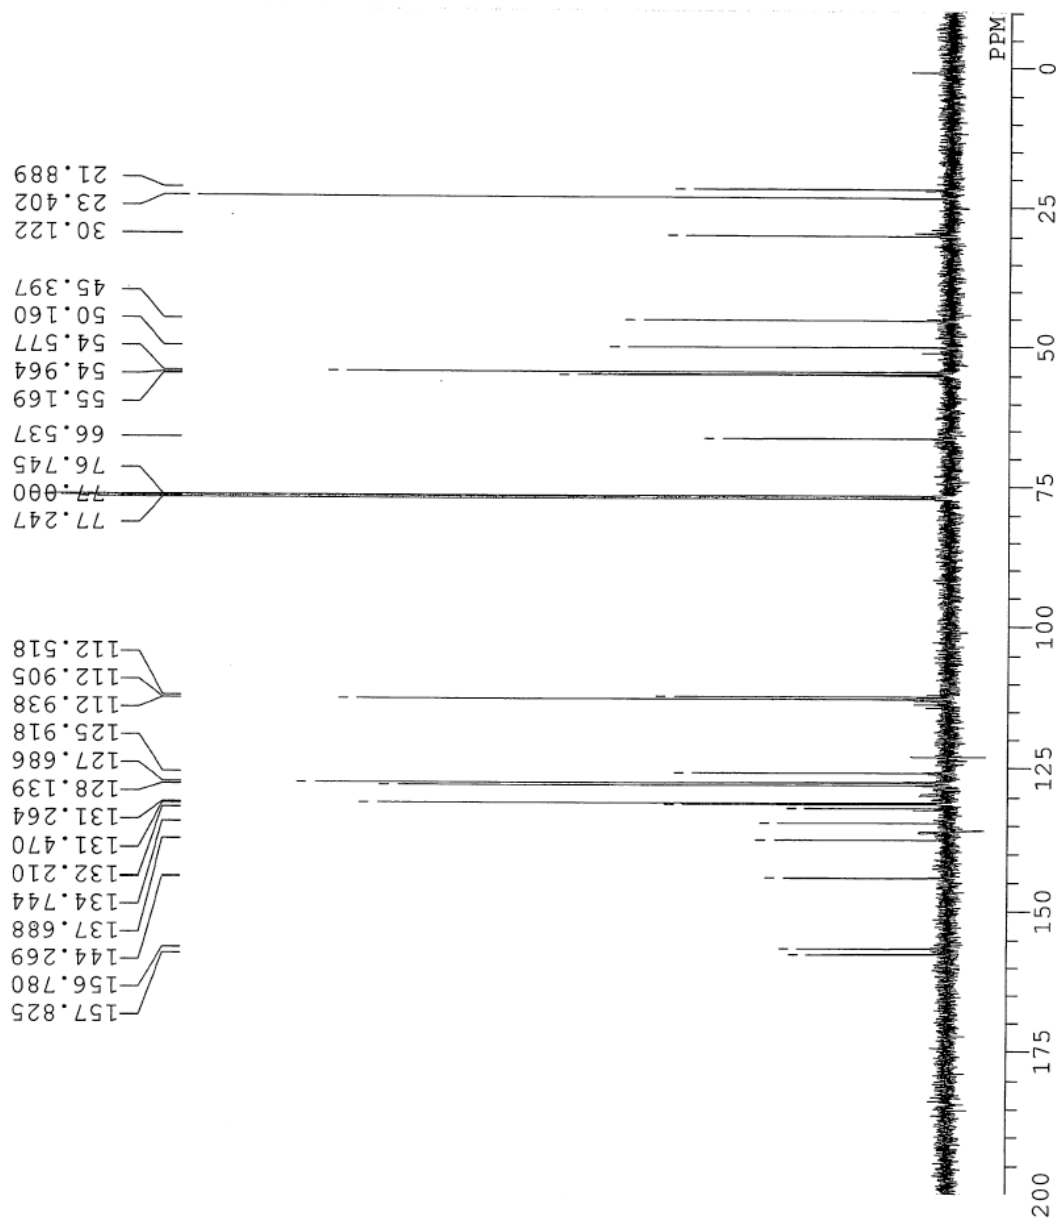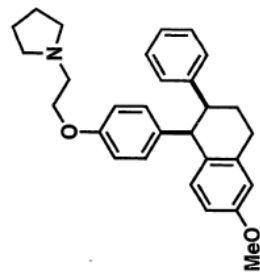

E:\kn-2-167-P1.als  
kn-2-167-P1

DFILE E:\kn-2-167-P1.als  
COMNT kn-2-167-P1  
DATIM Wed Jan 24 15:54:53 20  
OBNUC 1H  
EXMOD non  
OBFRQ 500.00 MHz  
OBSET 0.00 KHz  
OBFIN 162160.00 Hz  
POINT 32768  
FREQU 10000.00 Hz  
SCANS 8  
ACQTM 3.2768 sec  
PD 3.7232 sec  
PW1 5.95 usec  
IRNUC 1H  
CTEMP 22.4 C  
SLVNT CDCL3  
EXREF 7.26 ppm  
BF 0.12 Hz  
RGAIN 16

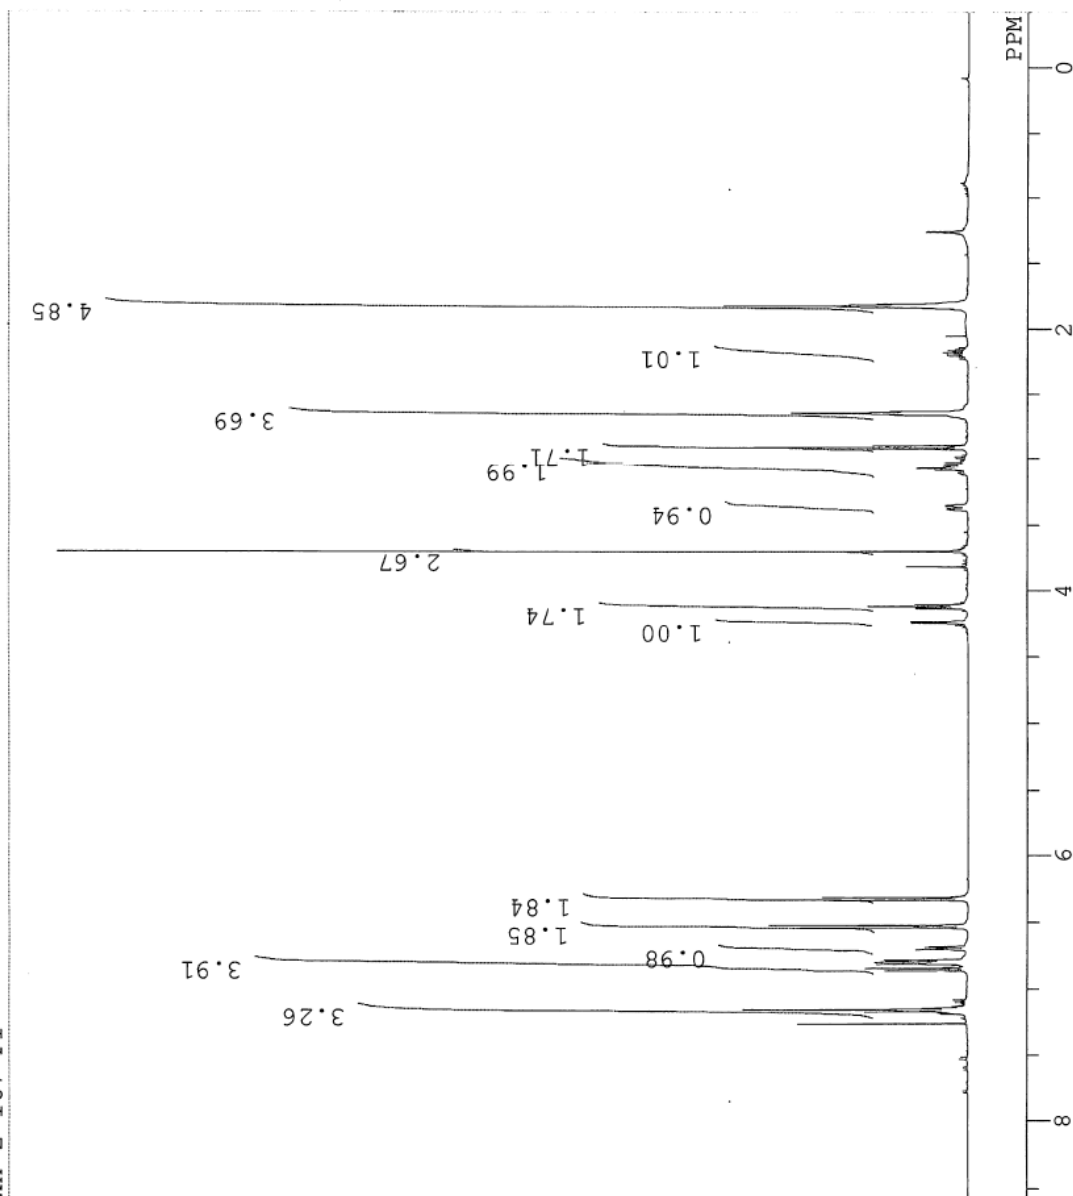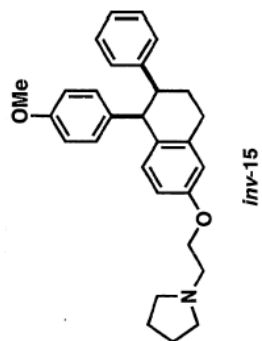

F:\kn-2-167-13C.als  
kn-2-167-13C

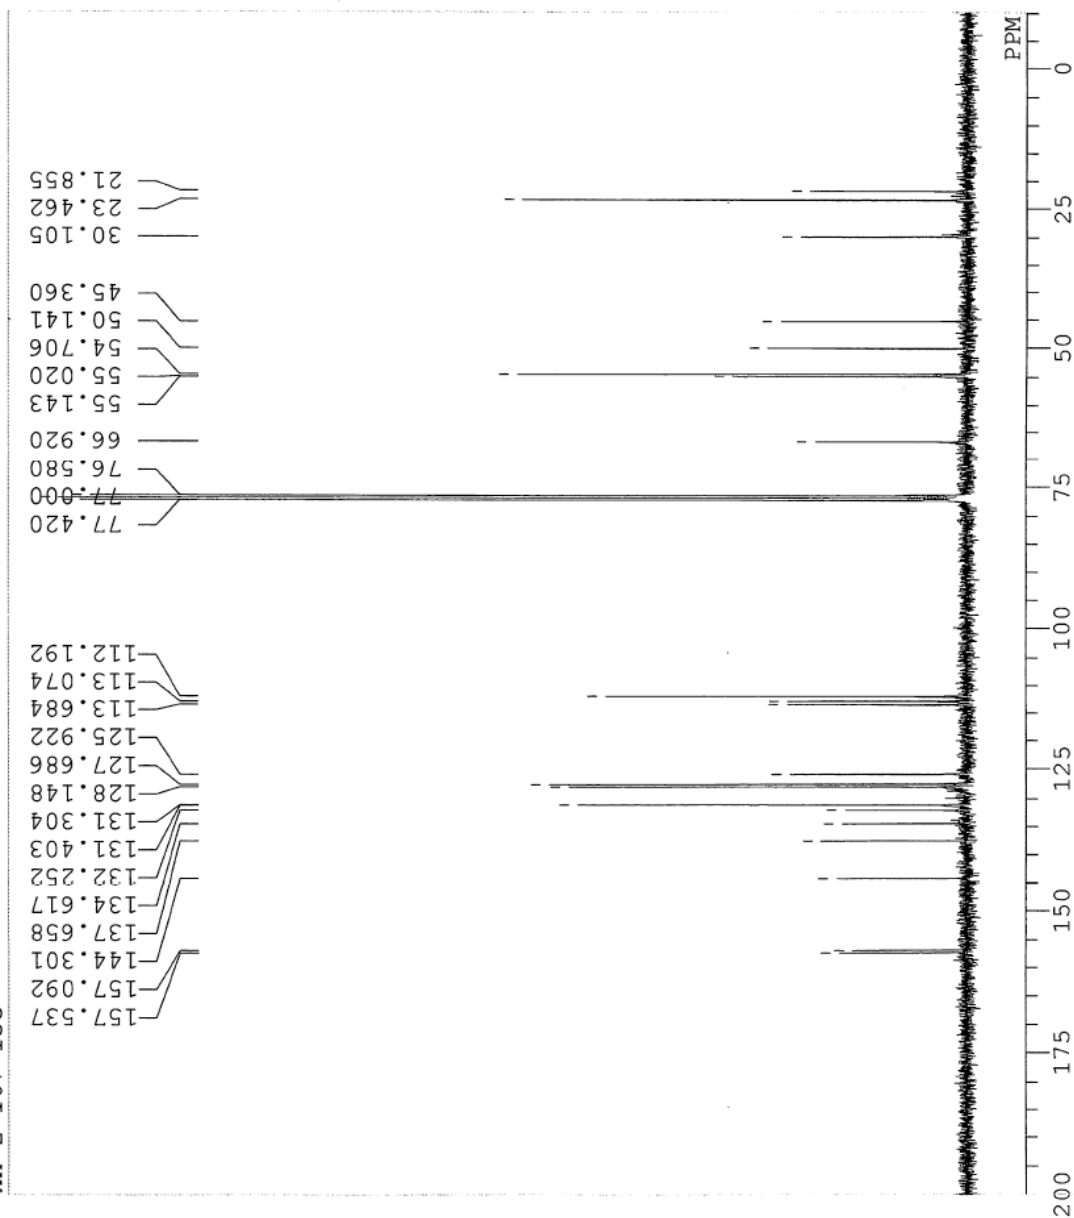

DFILE F:\kn-2-167-13C.als  
COMNT kn-2-167-13C  
DATIM Wed Jan 24 18:18:50 20  
OBNUC 13C  
EXMOD BCM  
OBFRQ 75.45 MHz  
OBSET 124.00 KHz  
OBFIN 1840.00 Hz  
POINT 32768  
FREQU 20408.10 Hz  
SCANS 900  
ACQTM 1.6056 sec  
PD 1.3944 sec  
PW1 4.10 usec  
IRNUC 1H  
CTEMP 20.7 C  
SLVNT CDCL3  
EXREF 77.00 ppm  
BF 1.20 Hz  
RGAIN 22

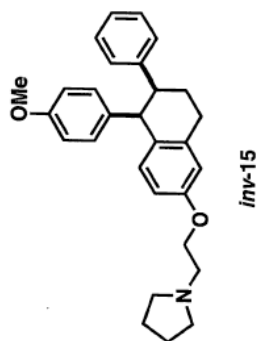

F:\kn-1-199-1fin.als  
kn-1-199-1fin

DFILE F:\kn-1-199-1fin.als  
COMNT kn-1-199-1fin  
DATIM Fri Sep 29 10:45:19 2010  
OBNUC 1H  
EXMOD NON  
OBFRQ 300.40 MHz  
OBSET 130.00 KHz  
OBFIN 1150.00 Hz  
POINT 32768  
FREQU 6020.40 Hz  
SCANS 8  
ACQTM 5.4428 sec  
PD 1.5539 sec  
PW1 5.40 usec  
IRNUC 1H  
CTEMP 21.3 c  
SLVNT CDCL3  
EXREF 7.26 ppm  
BF 0.12 Hz  
RGAIN 16

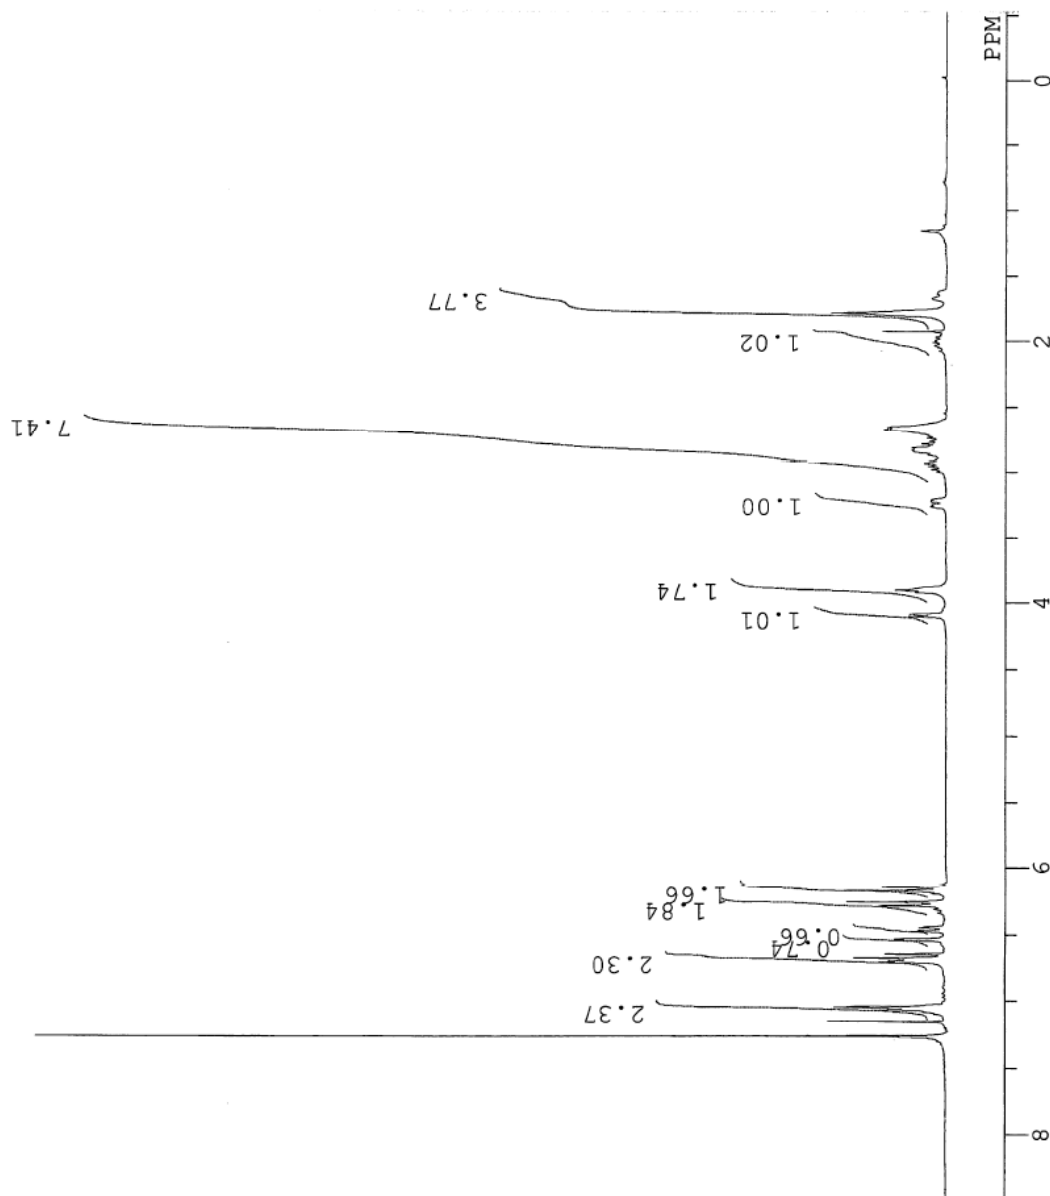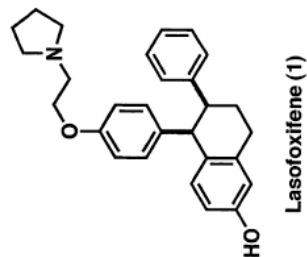

DFILE  
COMNT  
DATM  
OBNUC  
EXMOD  
OBFRQ  
OBSET  
OBFIN  
POINT  
FREQU  
SCANS  
ACQTM  
PD  
PWI  
IRNUC  
CTEMP  
SLVNT  
EXREF  
BF  
RGAIN

F:\kn-1-199laso13C.als  
Fri Sep 29 17:11:41 2006  
13C  
bcm  
125.65 MHz  
0.00 KHz  
127958.00 Hz  
32768  
33898.30 Hz  
880  
0.9667 sec  
2.0333 sec  
5.10 usec  
1H  
25.6 c  
CDCL3  
77.00 ppm  
1.20 Hz  
28

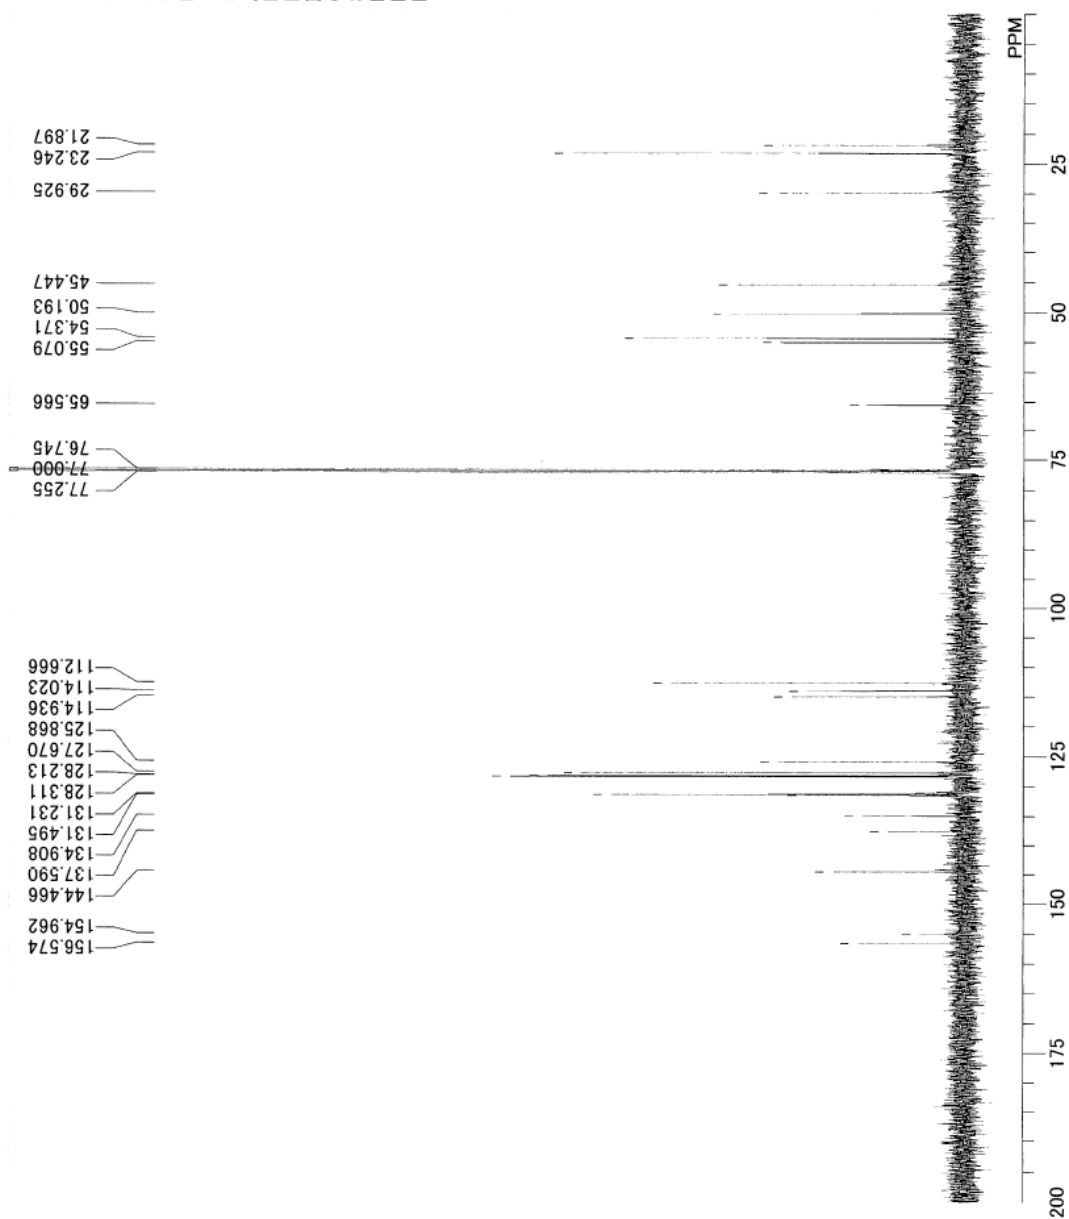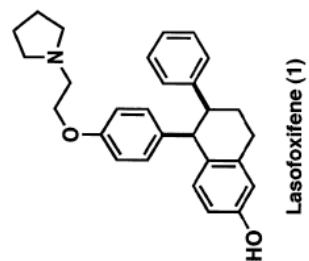

E:\kn-InvnafoP3.als  
kn-2-167-P3

DFILE E:\kn-InvnafoP3.als  
COMNT kn-2-167-P3  
DATIM Sat Jan 27 15:16:36 20  
OBNUC 1H  
EXMOD non  
OBFRQ 500.00 MHz  
OBSET 0.00 KHz  
OBFIN 162160.00 Hz  
POINT 32768  
FREQU 10000.00 Hz  
SCANS 8  
ACQTM 3.2768 sec  
PD 3.7232 sec  
PW1 5.95 usec  
IRNUC 1H  
CTEMP 22.3 C  
SLVNT CDCl3  
EXREF 0.00 ppm  
BF 0.12 Hz  
RGAIN 23

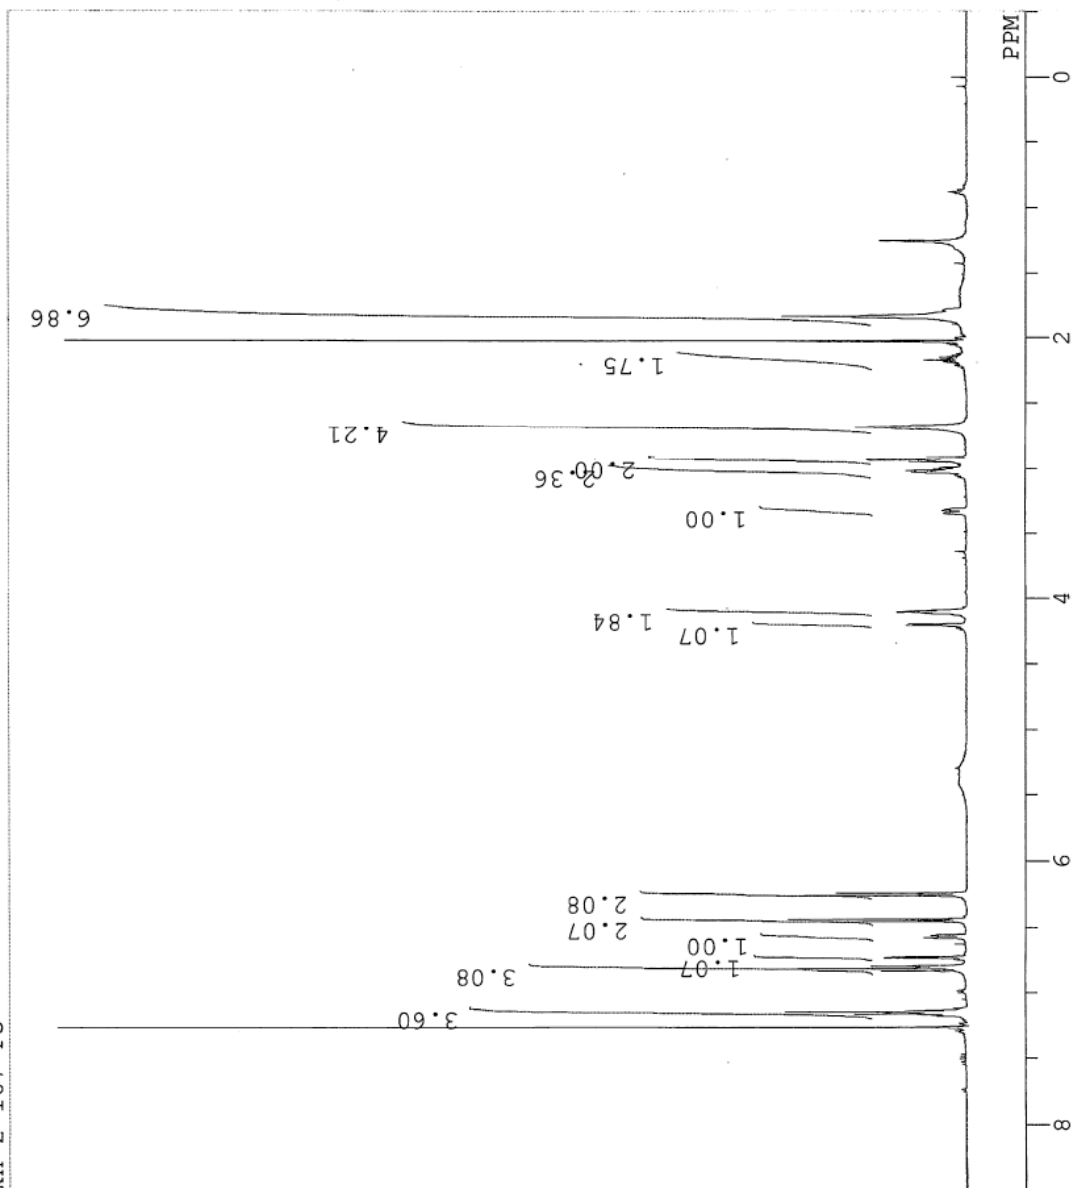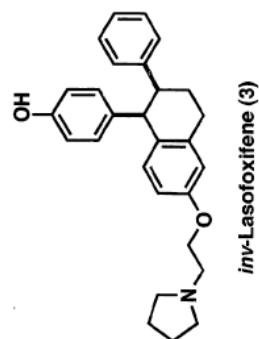



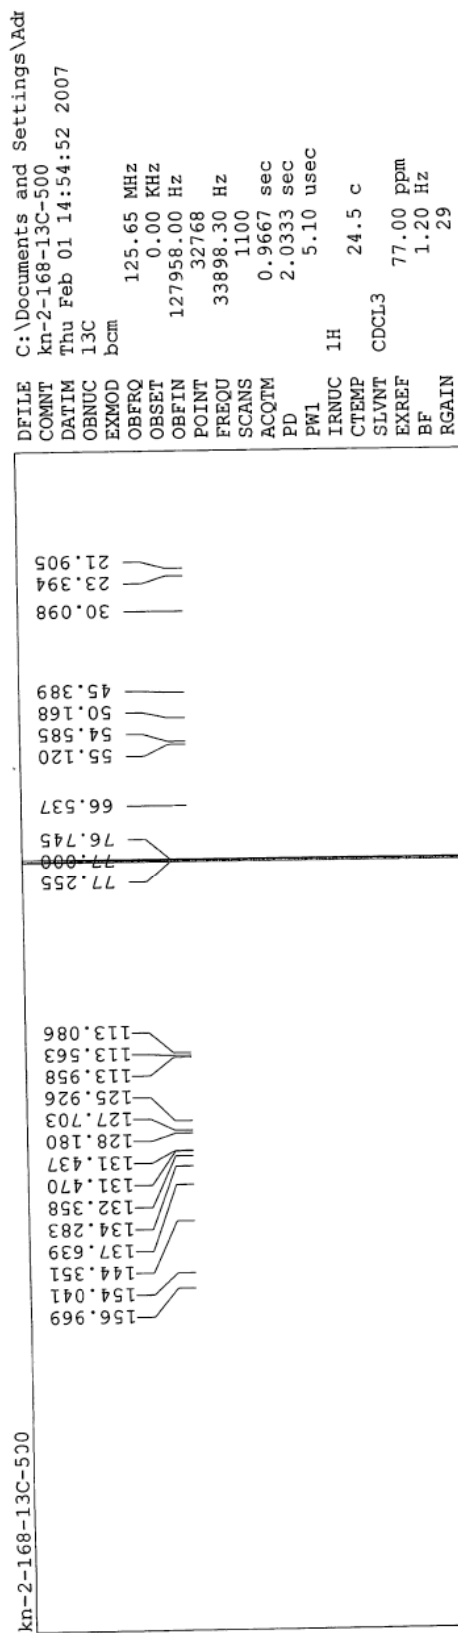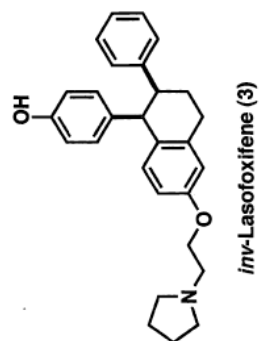

Supplement: s1 [file s1]
